# Supplementary material for: Genetic Environment of cry1 Genes Indicates Their Common Origin
Source: PubMed Central journal article supplement — Genome Biol Evol. 2017 Aug 23;9(9):2265–75. doi: 10.1093/gbe/evx165 (PMC5604178; doi:10.1093/gbe/evx165), 2017-08-23
Supplement: evx165_Supp.pdf [file evx165_Supp.pdf]

## Genetic environment of *cry1* genes indicates their common origin

Krzysztof Fiedoruk<sup>1</sup>, Tamara Daniluk<sup>1</sup>, Jacques Mahillon<sup>2</sup>, Katarzyna Leszczynska<sup>1</sup>, Izabela Swiecicka<sup>3,4</sup>

<sup>1</sup> Department of Microbiology, Medical University of Bialystok, Bialystok, Poland.

<sup>2</sup> Laboratory of Food and Environmental Microbiology, Earth and Life Institute, Université catholique de Louvain, Louvain-la-Neuve, Belgium.

<sup>3</sup> Department of Microbiology, University of Bialystok, Bialystok, Poland.

<sup>4</sup> Laboratory of Applied Microbiology, University of Bialystok, Bialystok, Poland.

### Supplementary Material online

|                   |                                                                                                                                                                                                                                                                                                                                                                                                                                                                                                                                                                                                                                 |
|-------------------|---------------------------------------------------------------------------------------------------------------------------------------------------------------------------------------------------------------------------------------------------------------------------------------------------------------------------------------------------------------------------------------------------------------------------------------------------------------------------------------------------------------------------------------------------------------------------------------------------------------------------------|
| <b>Table S1</b>   | Plasmids screened for the presence of the <i>cry1</i> genes.                                                                                                                                                                                                                                                                                                                                                                                                                                                                                                                                                                    |
| <b>Table S2</b>   | Open reading frames (ORFs) in the ~120 kb plasmid region covering the insecticidal pathogenicity island (PAI) from <i>B. thuringiensis</i> IS5056 plasmid pIS56-285 (CP004136). ORFs were annotated using Blast2GO software.                                                                                                                                                                                                                                                                                                                                                                                                    |
| <b>Figure S1</b>  | The insecticidal pathogenicity island (PAI) in the <i>B. thuringiensis</i> plasmids.                                                                                                                                                                                                                                                                                                                                                                                                                                                                                                                                            |
| <b>Figure S2</b>  | The <i>cry1</i> gene cassette in the <i>B. thuringiensis</i> plasmids. The insecticidal pathogenicity island (PAI) was used as the reference.                                                                                                                                                                                                                                                                                                                                                                                                                                                                                   |
| <b>Figure S3</b>  | (a) Alignment of the downstream region of <i>cry1</i> genes containing the positive retroregulator. (b) Comparison of sequence identity of the positive retroregulator between various <i>cry1</i> genes using UPGMA clustering method. (c) Prediction of the lowest free energy ( $\Delta G$ in kcal/mol) structure for mRNA of various variants of the <i>cry1</i> positive retroregulator. The analysis was done using RNA structure web server ( <a href="http://rna.urmc.rochester.edu/RNAstructureWeb/Servers/Predict1/Predict1.html">http://rna.urmc.rochester.edu/RNAstructureWeb/Servers/Predict1/Predict1.html</a> ). |
| <b>Figure S4</b>  | Intergenic region between <i>cry1Aa</i> and <i>cry1Ia</i> from the insecticidal PAI (plasmid pBMB299, GenBank Acc. no. CP004876, was used as the reference sequence).                                                                                                                                                                                                                                                                                                                                                                                                                                                           |
| <b>Figure S5</b>  | Comparison of plasmids with <i>ori44</i> and <i>repA</i> replication systems carrying <i>cry1A</i> or <i>cry1F</i> with related plasmids missing the <i>cry1</i> genes.                                                                                                                                                                                                                                                                                                                                                                                                                                                         |
| <b>Figure S6</b>  | Comparison of plasmids with <i>ori60</i> replication type carrying <i>cry1A</i> or <i>cry1B</i> with similar plasmids missing the <i>cry1</i> genes.                                                                                                                                                                                                                                                                                                                                                                                                                                                                            |
| <b>Figure S7</b>  | Comparison of plasmid with <i>ori43</i> replication system carrying <i>cry1A</i> with related plasmids missing the <i>cry1</i> genes.                                                                                                                                                                                                                                                                                                                                                                                                                                                                                           |
| <b>Figure S8</b>  | Putative gene cassette (~120 kb) covering the insecticidal PAI.                                                                                                                                                                                                                                                                                                                                                                                                                                                                                                                                                                 |
| <b>Figure S9</b>  | Inconsistencies in <i>cry1Ac</i> location in plasmids from the same <i>B. thuringiensis</i> strains deposited in GenBank by various sequencing projects; (a) <i>B. thuringiensis</i> sv. <i>kurstaki</i> HD-1 plasmids (CP009999-CP010000 vs. CP004875-CP004876), and (b) <i>B. thuringiensis</i> sv. <i>kurstaki</i> strain YBT-1520 plasmids (CP007613 vs. CP004862).                                                                                                                                                                                                                                                         |
| <b>Figure S10</b> | Genetic environment of <i>cry1I</i> , <i>cry1M</i> , <i>cry1N-like</i> and <i>cry3A</i> genes.                                                                                                                                                                                                                                                                                                                                                                                                                                                                                                                                  |
| <b>Figure S11</b> | Comparison of <i>B. subtilis</i> K <sup>+</sup> (Na <sup>+</sup> )/H <sup>+</sup> antiporter encoded by the <i>yhaU-yhaT-yhaS</i> operon with K <sup>+</sup> (Na <sup>+</sup> )/H <sup>+</sup> antiporters from <i>B. thuringiensis</i> IS5056 chromosome and the <i>cry1</i> -carrying plasmids, using the tblastx algorithm.                                                                                                                                                                                                                                                                                                  |
| <b>Figure S12</b> | Comparison of methyl-accepting chemotaxis protein (MCP) from the insecticidal PAI of <i>B. thuringiensis</i> IS5056 plasmid pIS56-285 (CP004136) with its chromosomal homolog (AGG02078.1).                                                                                                                                                                                                                                                                                                                                                                                                                                     |
| <b>Figure S13</b> | Comparison of <i>B. subtilis</i> <i>xlyA</i> with N-acetylmuramoyl-L-alanine amidase genes from <i>B. thuringiensis</i> IS5056 chromosome and the <i>cry1</i> -carrying plasmids, using the tblastx algorithm.                                                                                                                                                                                                                                                                                                                                                                                                                  |
| <b>Figure S14</b> | Comparison (tblastx algorithm) of ADP-ribose 1-phosphate phosphatase gene locus from the insecticidal PAI ( <i>B. thuringiensis</i> IS5056 plasmid pIS56-285) with similar loci from the chromosomes of <i>Geobacillus subterraneus</i> , <i>Anoxybacillus amylolyticus</i> and <i>Paenibacillus</i> sp..                                                                                                                                                                                                                                                                                                                       |

**Table S1.** Plasmids screened for the presence of the *cry1* genes.

| Strain and plasmid                                                   | Accession number | Length [bp] |
|----------------------------------------------------------------------|------------------|-------------|
| <i>B. bombysepticus</i> plasmid pBb                                  | CP007513         | 577,809     |
| <i>B. cereus</i> 03BB102 plasmid p03BB102_179                        | CP001406         | 179,680     |
| <i>B. cereus</i> 03BB102 plasmid unnamed                             | CP009317         | 179,680     |
| <i>B. cereus</i> 03BB108 plasmid pBFI_1                              | CP009639         | 281,957     |
| <i>B. cereus</i> 03BB108 plasmid pBFI_2                              | CP009636         | 238,933     |
| <i>B. cereus</i> 03BB108 plasmid pBFI_3                              | CP009640         | 85,879      |
| <i>B. cereus</i> 03BB108 plasmid pBFI_4                              | CP009638         | 61,862      |
| <i>B. cereus</i> 03BB108 plasmid pBFI_5                              | CP009637         | 42,470      |
| <i>B. cereus</i> 03BB108 plasmid pBFI_6                              | CP009635         | 9,797       |
| <i>B. cereus</i> 03BB108 plasmid pBFI_7                              | CP009634         | 4,898       |
| <i>B. cereus</i> AH187 plasmid pAH187_12                             | CP001178         | 12,481      |
| <i>B. cereus</i> AH187 plasmid pAH187_270                            | CP001179         | 270,082     |
| <i>B. cereus</i> AH187 plasmid pAH187_3                              | CP001181         | 3,091       |
| <i>B. cereus</i> AH187 plasmid pAH187_45                             | CP001180         | 45,173      |
| <i>B. cereus</i> AH820 plasmid pAH820_10                             | CP001286         | 10,915      |
| <i>B. cereus</i> AH820 plasmid pAH820_272                            | CP001285         | 272,145     |
| <i>B. cereus</i> AH820 plasmid pAH820_3                              | CP001284         | 3,091       |
| <i>B. cereus</i> ATCC 10987 plasmid pBc10987                         | AE017195         | 208,369     |
| <i>B. cereus</i> ATCC 14579 plasmid pBClin15                         | AE016878         | 15,274      |
| <i>B. cereus</i> ATCC 4342 plasmid pBGM                              | CP009627         | 36,802      |
| <i>B. cereus</i> biovar <i>anthracis</i> strain CI plasmid pBAsIC114 | CP001749         | 14,219      |
| <i>B. cereus</i> biovar <i>anthracis</i> strain CI plasmid pCI-XO1   | CP001747         | 181,907     |
| <i>B. cereus</i> biovar <i>anthracis</i> strain CI plasmid pCI-XO2   | CP001748         | 94,469      |
| <i>B. cereus</i> D17 plasmid unnamed                                 | CP009299         | 210,673     |
| <i>B. cereus</i> E33L plasmid pBCO_1                                 | CP009967         | 465,970     |
| <i>B. cereus</i> E33L plasmid pBCO_2                                 | CP009966         | 53,501      |
| <i>B. cereus</i> E33L plasmid pBCO_3                                 | CP009969         | 9,146       |
| <i>B. cereus</i> E33L plasmid pBCO_4                                 | CP009970         | 7,863       |
| <i>B. cereus</i> E33L plasmid pBCO_5                                 | CP009965         | 4,983       |
| <i>B. cereus</i> E33L plasmid pE33L466                               | CP000040         | 466,370     |
| <i>B. cereus</i> E33L plasmid pE33L5                                 | CP000041         | 5,108       |
| <i>B. cereus</i> E33L plasmid pE33L54                                | CP000042         | 53,501      |
| <i>B. cereus</i> E33L plasmid pE33L8                                 | CP000043         | 8,191       |
| <i>B. cereus</i> E33L plasmid pE33L9                                 | CP000044         | 9,150       |
| <i>B. cereus</i> F837/76 plasmid pF837_10                            | CP003189         | 10,288      |
| <i>B. cereus</i> F837/76 plasmid pF837_55                            | CP003188         | 55,304      |
| <i>B. cereus</i> FRI-35 plasmid p01                                  | CP003748         | 218,786     |
| <i>B. cereus</i> FRI-35 plasmid p02                                  | CP003749         | 40,993      |
| <i>B. cereus</i> FRI-35 plasmid p03                                  | CP003750         | 36,273      |
| <i>B. cereus</i> FRI-35 plasmid p04                                  | CP003751         | 3,091       |
| <i>B. cereus</i> G9241 plasmid pBC210                                | CP009591         | 209,255     |
| <i>B. cereus</i> G9241 plasmid pBCX01                                | CP009592         | 190,860     |
| <i>B. cereus</i> G9241 plasmid pBFH_1                                | CP009589         | 52,166      |
| <i>B. cereus</i> G9842 plasmid pG9842_140                            | CP001188         | 140,001     |
| <i>B. cereus</i> G9842 plasmid pG9842_209                            | CP001187         | 209,488     |
| <i>B. cereus</i> H3081.97 plasmid pH308197_10                        | CP001168         | 10,077      |
| <i>B. cereus</i> H3081.97 plasmid pH308197_11                        | CP001167         | 11,567      |
| <i>B. cereus</i> H3081.97 plasmid pH308197_258                       | CP001166         | 258,484     |
| <i>B. cereus</i> H3081.97 plasmid pH308197_29                        | CP001169         | 29,189      |
| <i>B. cereus</i> H3081.97 plasmid pH308197_3                         | CP001171         | 3,424       |
| <i>B. cereus</i> H3081.97 plasmid pH308197_73                        | CP001170         | 72,792      |
| <i>B. cereus</i> NC7401 plasmid pNC1 DNA                             | AP007211         | 47,972      |
| <i>B. cereus</i> NC7401 plasmid pNC2 DNA                             | AP007212         | 5,436       |
| <i>B. cereus</i> NC7401 plasmid pNC3 DNA                             | AP007213         | 3,869       |
| <i>B. cereus</i> NC7401 plasmid pNC4 DNA                             | AP007214         | 3,091       |
| <i>B. cereus</i> NC7401 plasmid pNCcld DNA                           | AP007210         | 270,082     |

|                                                                     |           |         |
|---------------------------------------------------------------------|-----------|---------|
| <i>B. cereus</i> plasmid pBC16                                      | U32369    | 4,630   |
| <i>B. cereus</i> plasmid pBC-Tim DNA                                | NC_025012 | 8,983   |
| <i>B. cereus</i> plasmid pPRS3a                                     | GQ404376  | 4,126   |
| <i>B. cereus</i> Q1 plasmid pBc239                                  | CP000228  | 239,246 |
| <i>B. cereus</i> Q1 plasmid pBc53                                   | CP000229  | 52,766  |
| <i>B. cereus</i> strain 03BB87 plasmid pBCN                         | CP009939  | 52,166  |
| <i>B. cereus</i> strain 03BB87 plasmid pBCX01                       | CP009940  | 209,381 |
| <i>B. cereus</i> strain 3a plasmid pBFC_1                           | CP009593  | 7,300   |
| <i>B. cereus</i> strain 3a plasmid pBFC_2                           | CP009594  | 51,531  |
| <i>B. cereus</i> strain 3a plasmid pBFC_3                           | CP009595  | 312,478 |
| <i>B. cereus</i> strain A1 plasmid pBCA1                            | CP015730  | 300,156 |
| <i>B. cereus</i> strain A1 plasmid pBCA2                            | CP015728  | 70,374  |
| <i>B. cereus</i> strain A1 plasmid pBCA3                            | CP015729  | 11,778  |
| <i>B. cereus</i> strain AH187 plasmid pCER270                       | DQ889676  | 270,082 |
| <i>B. cereus</i> strain AH818 plasmid pPER272                       | DQ889678  | 272,145 |
| <i>B. cereus</i> strain AH820 plasmid pPER272                       | DQ889677  | 272,145 |
| <i>B. cereus</i> strain AR156 plasmid pAR10                         | CP015590  | 10,789  |
| <i>B. cereus</i> strain AR156 plasmid pAR41                         | CP015591  | 40,712  |
| <i>B. cereus</i> strain AR156 plasmid pAR460                        | CP015592  | 459,971 |
| <i>B. cereus</i> strain CMCC P0011 plasmid pRML05                   | CP011154  | 591,112 |
| <i>B. cereus</i> strain CMCC P0021 plasmid pRML04                   | CP011152  | 591,110 |
| <i>B. cereus</i> strain FM1 plasmid unnamed                         | CP009368  | 402,605 |
| <i>B. cereus</i> strain FORC_013 plasmid pFORC13                    | CP011146  | 259,749 |
| <i>B. cereus</i> strain G9241 plasmid pBC210                        | DQ889679  | 209,385 |
| <i>B. cereus</i> strain G9241 plasmid pBCX01                        | DQ889680  | 190,861 |
| <i>B. cereus</i> strain HN001 plasmid pRML01                        | CP011156  | 435,420 |
| <i>B. cereus</i> strain HN001 plasmid pRML02                        | CP011157  | 141,238 |
| <i>B. cereus</i> strain NJ-W plasmid plasmid-32                     | CP012485  | 11,744  |
| <i>B. cereus</i> strain NJ-W plasmid plasmid-35-36                  | CP012484  | 9,032   |
| <i>B. cereus</i> strain NJ-W plasmid plasmid-37                     | CP012486  | 7,703   |
| <i>B. cereus</i> strain S2-8 plasmid pBFR_1                         | CP009604  | 7,300   |
| <i>B. cereus</i> strain S2-8 plasmid pBFR_2                         | CP009606  | 312,478 |
| <i>B. cereus</i> strain S2-8 plasmid pBFR_3                         | CP009603  | 51,512  |
| <i>B. cereus</i> subsp. <i>cytotoxis</i> NVH 391-98 plasmid pBC9801 | CP000765  | 7,135   |
| <i>B. cereus</i> VPC1401 plasmid pLVP1401                           | FR675941  | 56,149  |
| <i>B. thuringiensis</i> 4Q2 plasmid pTX14-2                         | NC_004334 | 6,829   |
| <i>B. thuringiensis</i> BMB171 plasmid pBMB171                      | NC_014172 | 312,963 |
| <i>B. thuringiensis</i> Bt407 plasmid BTB_15p                       | CP003892  | 15,189  |
| <i>B. thuringiensis</i> Bt407 plasmid BTB_2p                        | CP003897  | 2,062   |
| <i>B. thuringiensis</i> Bt407 plasmid BTB_502p                      | CP003890  | 501,911 |
| <i>B. thuringiensis</i> Bt407 plasmid BTB_5p                        | CP003896  | 5,518   |
| <i>B. thuringiensis</i> Bt407 plasmid BTB_6p                        | CP003895  | 6,880   |
| <i>B. thuringiensis</i> Bt407 plasmid BTB_78p                       | CP003891  | 77,895  |
| <i>B. thuringiensis</i> Bt407 plasmid BTB_7p                        | CP003894  | 7,635   |
| <i>B. thuringiensis</i> Bt407 plasmid BTB_8p                        | CP003893  | 8,240   |
| <i>B. thuringiensis</i> Bt407 plasmid BTB_9p                        | CP003898  | 8,513   |
| <i>B. thuringiensis</i> CT43 plasmid pBMB0558                       | NC_014937 | 109,464 |
| <i>B. thuringiensis</i> H1.1 plasmid pGI3                           | NC_005567 | 11,365  |
| <i>B. thuringiensis</i> HD1002 plasmid 1                            | CP009349  | 359,439 |
| <i>B. thuringiensis</i> HD1002 plasmid 2                            | CP009348  | 349,602 |
| <i>B. thuringiensis</i> HD1002 plasmid 3                            | CP009347  | 235,425 |
| <i>B. thuringiensis</i> HD1002 plasmid 4                            | CP009350  | 107,443 |
| <i>B. thuringiensis</i> HD1002 plasmid 5                            | CP009346  | 14,961  |
| <i>B. thuringiensis</i> HD1002 plasmid 6                            | CP009345  | 7,697   |
| <i>B. thuringiensis</i> HD1002 plasmid 7                            | CP009344  | 6,824   |
| <i>B. thuringiensis</i> HD-771 plasmid p01                          | CP003753  | 171,030 |
| <i>B. thuringiensis</i> HD-771 plasmid p02                          | CP003754  | 168,999 |
| <i>B. thuringiensis</i> HD-771 plasmid p03                          | CP003755  | 69,876  |
| <i>B. thuringiensis</i> HD-771 plasmid p04                          | CP003756  | 65,470  |

|                                                                                 |             |         |
|---------------------------------------------------------------------------------|-------------|---------|
| <i>B. thuringiensis</i> HD-771 plasmid p05                                      | CP003757    | 45,262  |
| <i>B. thuringiensis</i> HD-771 plasmid p06                                      | CP003758    | 14,056  |
| <i>B. thuringiensis</i> HD-771 plasmid p07                                      | CP003759    | 9,070   |
| <i>B. thuringiensis</i> HD-771 plasmid p08                                      | CP003760    | 8,574   |
| <i>B. thuringiensis</i> HD-789 plasmid pBTHD789-1                               | CP003764    | 349,599 |
| <i>B. thuringiensis</i> HD-789 plasmid pBTHD789-2                               | CP003765    | 235,425 |
| <i>B. thuringiensis</i> HD-789 plasmid pBTHD789-3                               | CP003766    | 224,872 |
| <i>B. thuringiensis</i> HD-789 plasmid pBTHD789-4                               | CP003767    | 14,935  |
| <i>B. thuringiensis</i> HD-789 plasmid pBTHD789-5                               | CP003768    | 7,697   |
| <i>B. thuringiensis</i> HD-789 plasmid pBTHD789-6                               | CP003769    | 6,824   |
| <i>B. thuringiensis</i> MC28 plasmid pMC183                                     | CP003691    | 183,210 |
| <i>B. thuringiensis</i> MC28 plasmid pMC189                                     | CP003692    | 189,702 |
| <i>B. thuringiensis</i> MC28 plasmid pMC319                                     | CP003693    | 319,710 |
| <i>B. thuringiensis</i> MC28 plasmid pMC429                                     | CP003694    | 429,674 |
| <i>B. thuringiensis</i> MC28 plasmid pMC54                                      | CP003689    | 54,484  |
| <i>B. thuringiensis</i> MC28 plasmid pMC8                                       | CP003688    | 7,826   |
| <i>B. thuringiensis</i> MC28 plasmid pMC95                                      | CP003690    | 95,433  |
| <i>B. thuringiensis</i> plasmid pBMB2062-2                                      | NC_019228   | 2,062   |
| <i>B. thuringiensis</i> plasmid pBMB67                                          | NC_009841   | 67,159  |
| <i>B. thuringiensis</i> plasmid pDAN-involved                                   | NC_007203   | 6,909   |
| <i>B. thuringiensis</i> plasmid pFR12                                           | NC_010281   | 12,095  |
| <i>B. thuringiensis</i> plasmid pFR12.5                                         | NC_010282   | 12,459  |
| <i>B. thuringiensis</i> plasmid pFR55                                           | NC_010283   | 55,712  |
| <i>B. thuringiensis</i> plasmid pK1S1                                           | NC_009034   | 5,475   |
| <i>B. thuringiensis</i> serovar <i>aizawai</i> strain 1-3 plasmid pBt1-3        | NC_020884   | 11,363  |
| <i>B. thuringiensis</i> serovar <i>alesti</i> strain BGSC 4C1 plasmid pBMB267   | CP015177    | 267,609 |
| <i>B. thuringiensis</i> serovar <i>alesti</i> strain BGSC 4C1 plasmid pBMB4227  | CP015178    | 4,227   |
| <i>B. thuringiensis</i> serovar <i>alesti</i> strain BGSC 4C1 plasmid pBMB57    | CP015179    | 57,268  |
| <i>B. thuringiensis</i> serovar <i>alesti</i> strain BGSC 4C1 plasmid pBMB71    | CP015180    | 71,696  |
| <i>B. thuringiensis</i> serovar <i>alesti</i> strain BGSC 4C1 plasmid pBMB8208  | CP015181    | 8,208   |
| <i>B. thuringiensis</i> serovar <i>alesti</i> strain BGSC 4C1 plasmid pBMB8291  | CP015182    | 8,291   |
| <i>B. thuringiensis</i> serovar <i>cameroun</i> plasmid pBMB2062-32             | NC_017197   | 2,062   |
| <i>B. thuringiensis</i> serovar <i>chinensis</i> CT-43 plasmid pCT127           | CP001908    | 127,885 |
| <i>B. thuringiensis</i> serovar <i>chinensis</i> CT-43 plasmid pCT14            | CP001909    | 14,860  |
| <i>B. thuringiensis</i> serovar <i>chinensis</i> CT-43 plasmid pCT281           | CP001910    | 281,231 |
| <i>B. thuringiensis</i> serovar <i>chinensis</i> CT-43 plasmid pCT51            | CP001911    | 51,488  |
| <i>B. thuringiensis</i> serovar <i>chinensis</i> CT-43 plasmid pCT6880          | CP001912    | 6,880   |
| <i>B. thuringiensis</i> serovar <i>chinensis</i> CT-43 plasmid pCT72            | CP001913    | 72,074  |
| <i>B. thuringiensis</i> serovar <i>chinensis</i> CT-43 plasmid pCT8252          | CP001914    | 8,252   |
| <i>B. thuringiensis</i> serovar <i>chinensis</i> CT-43 plasmid pCT83            | CP001915    | 83,590  |
| <i>B. thuringiensis</i> serovar <i>chinensis</i> CT-43 plasmid pCT8513          | CP001916    | 8,513   |
| <i>B. thuringiensis</i> serovar <i>chinensis</i> CT-43 plasmid pCT9547          | CP001917    | 9,547   |
| <i>B. thuringiensis</i> serovar <i>coreanensis</i> strain ST7 plasmid pST7-1    | CP016195    | 317,818 |
| <i>B. thuringiensis</i> serovar <i>coreanensis</i> strain ST7 plasmid pST7-2    | CP016196    | 149,450 |
| <i>B. thuringiensis</i> serovar <i>coreanensis</i> strain ST7 plasmid pST7-3    | CP016197    | 92,610  |
| <i>B. thuringiensis</i> serovar <i>coreanensis</i> strain ST7 plasmid pST7-4    | CP016198    | 60,883  |
| <i>B. thuringiensis</i> serovar <i>finitimus</i> YBT-020 plasmid pBMB26         | CP002509    | 187,880 |
| <i>B. thuringiensis</i> serovar <i>finitimus</i> YBT-020 plasmid pBMB28         | CP002510    | 139,013 |
| <i>B. thuringiensis</i> serovar <i>galleriae</i> strain HD-29 plasmid pBMB12    | CP010097    | 12,866  |
| <i>B. thuringiensis</i> serovar <i>galleriae</i> strain HD-29 plasmid pBMB126   | CP010092    | 126,898 |
| <i>B. thuringiensis</i> serovar <i>galleriae</i> strain HD-29 plasmid pBMB267   | CP010091    | 267,359 |
| <i>B. thuringiensis</i> serovar <i>galleriae</i> strain HD-29 plasmid pBMB426   | CP010090    | 426,282 |
| <i>B. thuringiensis</i> serovar <i>galleriae</i> strain HD-29 plasmid pBMB47    | CP010095    | 46,979  |
| <i>B. thuringiensis</i> serovar <i>galleriae</i> strain HD-29 plasmid pBMB55    | CP010094    | 55,460  |
| <i>B. thuringiensis</i> serovar <i>galleriae</i> strain HD-29 plasmid pBMB7     | CP010098    | 10,656  |
| <i>B. thuringiensis</i> serovar <i>galleriae</i> strain HD-29 plasmid pBMB71    | CP010093    | 71,373  |
| <i>B. thuringiensis</i> serovar <i>galleriae</i> strain HD-29 plasmid pBMB8     | CP010099    | 8,423   |
| <i>B. thuringiensis</i> serovar <i>galleriae</i> strain HD-29 plasmid pBMBLin15 | NZ_CP010096 | 14,749  |
| <i>B. thuringiensis</i> serovar <i>indiana</i> strain HD-521 plasmid pBTHD521-1 | CP010107    | 7,042   |

|                                                                                           |           |         |
|-------------------------------------------------------------------------------------------|-----------|---------|
| <i>B. thuringiensis</i> serovar <i>indiana</i> strain HD-521 plasmid pBTHD521-2           | CP010108  | 49,838  |
| <i>B. thuringiensis</i> serovar <i>indiana</i> strain HD-521 plasmid pBTHD521-3           | CP010109  | 71,771  |
| <i>B. thuringiensis</i> serovar <i>indiana</i> strain HD-521 plasmid pBTHD521-4           | CP010110  | 71,646  |
| <i>B. thuringiensis</i> serovar <i>indiana</i> strain HD-521 plasmid pBTHD521-5           | CP010111  | 253,580 |
| <i>B. thuringiensis</i> serovar <i>indiana</i> strain HD-521 plasmid pBTHD521-6           | CP010112  | 314,883 |
| <i>B. thuringiensis</i> serovar <i>israelensis</i> strain HD-567 plasmid pBtoxis          | NC_010076 | 127,923 |
| <i>B. thuringiensis</i> serovar <i>israelensis</i> strain AM65-52 plasmid pAM65-52-5-100K | CP013280  | 99,993  |
| <i>B. thuringiensis</i> serovar <i>konkukian</i> strain 97-27 plasmid pBT9727             | CP000047  | 77,112  |
| <i>B. thuringiensis</i> serovar <i>kurstaki</i> strain HD-1 plasmid pBMB14                | CP004883  | 14,721  |
| <i>B. thuringiensis</i> serovar <i>kurstaki</i> strain HD-1 plasmid pBMB2062              | CP004878  | 2,062   |
| <i>B. thuringiensis</i> serovar <i>kurstaki</i> strain HD-1 plasmid pBMB299               | CP004876  | 299,843 |
| <i>B. thuringiensis</i> serovar <i>kurstaki</i> strain HD-1 plasmid pBMB431               | CP004877  | 431,546 |
| <i>B. thuringiensis</i> serovar <i>kurstaki</i> strain HD-1 plasmid pBMB46                | CP004871  | 46,634  |
| <i>B. thuringiensis</i> serovar <i>kurstaki</i> strain HD-1 plasmid pBMB64                | CP004872  | 64,522  |
| <i>B. thuringiensis</i> serovar <i>kurstaki</i> strain HD-1 plasmid pBMB65                | CP004873  | 65,873  |
| <i>B. thuringiensis</i> serovar <i>kurstaki</i> strain HD-1 plasmid pBMB74                | CP004874  | 74,480  |
| <i>B. thuringiensis</i> serovar <i>kurstaki</i> strain HD-1 plasmid pBMB7635              | CP004879  | 7,635   |
| <i>B. thuringiensis</i> serovar <i>kurstaki</i> strain HD-1 plasmid pBMB8240              | CP004880  | 8,240   |
| <i>B. thuringiensis</i> serovar <i>kurstaki</i> strain HD-1 plasmid pBMB8513              | CP004881  | 8,513   |
| <i>B. thuringiensis</i> serovar <i>kurstaki</i> strain HD-1 plasmid pBMB95                | CP004875  | 95,983  |
| <i>B. thuringiensis</i> serovar <i>kurstaki</i> strain HD-1 plasmid pBMBLin15             | CP004882  | 14,870  |
| <i>B. thuringiensis</i> serovar <i>kurstaki</i> strain HD-73 plasmid pAW63                | CP004072  | 71,777  |
| <i>B. thuringiensis</i> serovar <i>kurstaki</i> strain HD-73 plasmid pHT11                | CP004073  | 11,769  |
| <i>B. thuringiensis</i> serovar <i>kurstaki</i> strain HD-73 plasmid pHT7                 | CP004076  | 7,635   |
| <i>B. thuringiensis</i> serovar <i>kurstaki</i> strain HD-73 plasmid pHT73                | CP004070  | 77,351  |
| <i>B. thuringiensis</i> serovar <i>kurstaki</i> strain HD-73 plasmid pHT77                | CP004071  | 76,490  |
| <i>B. thuringiensis</i> serovar <i>kurstaki</i> strain HD-73 plasmid pHT8_1               | CP004074  | 8,513   |
| <i>B. thuringiensis</i> serovar <i>kurstaki</i> strain HD-73 plasmid pHT8_2               | CP004075  | 8,241   |
| <i>B. thuringiensis</i> serovar <i>kurstaki</i> strain YBT-1520 plasmid pBMB11            | CP004863  | 11,769  |
| <i>B. thuringiensis</i> serovar <i>kurstaki</i> strain YBT-1520 plasmid pBMB11            | CP007612  | 12,003  |
| <i>B. thuringiensis</i> serovar <i>kurstaki</i> strain YBT-1520 plasmid pBMB2062          | CP004859  | 2,062   |
| <i>B. thuringiensis</i> serovar <i>kurstaki</i> strain YBT-1520 plasmid pBMB2062          | CP007608  | 2,062   |
| <i>B. thuringiensis</i> serovar <i>kurstaki</i> strain YBT-1520 plasmid pBMB293           | CP004861  | 293,574 |
| <i>B. thuringiensis</i> serovar <i>kurstaki</i> strain YBT-1520 plasmid pBMB293           | CP007615  | 293,574 |
| <i>B. thuringiensis</i> serovar <i>kurstaki</i> strain YBT-1520 plasmid pBMB400           | CP007616  | 416,210 |
| <i>B. thuringiensis</i> serovar <i>kurstaki</i> strain YBT-1520 plasmid pBMB422           | CP004860  | 422,692 |
| <i>B. thuringiensis</i> serovar <i>kurstaki</i> strain YBT-1520 plasmid pBMB53            | CP004862  | 53,838  |
| <i>B. thuringiensis</i> serovar <i>kurstaki</i> strain YBT-1520 plasmid pBMB67            | CP004869  | 67,159  |
| <i>B. thuringiensis</i> serovar <i>kurstaki</i> strain YBT-1520 plasmid pBMB69            | CP007613  | 69,416  |
| <i>B. thuringiensis</i> serovar <i>kurstaki</i> strain YBT-1520 plasmid pBMB7635          | CP004867  | 7,635   |
| <i>B. thuringiensis</i> serovar <i>kurstaki</i> strain YBT-1520 plasmid pBMB7635          | NC_011796 | 7,635   |
| <i>B. thuringiensis</i> serovar <i>kurstaki</i> strain YBT-1520 plasmid pBMB7921          | CP004866  | 7,921   |
| <i>B. thuringiensis</i> serovar <i>kurstaki</i> strain YBT-1520 plasmid pBMB7921          | CP007609  | 7,921   |
| <i>B. thuringiensis</i> serovar <i>kurstaki</i> strain YBT-1520 plasmid pBMB8240          | CP004865  | 8,240   |
| <i>B. thuringiensis</i> serovar <i>kurstaki</i> strain YBT-1520 plasmid pBMB8240          | CP007610  | 8,240   |
| <i>B. thuringiensis</i> serovar <i>kurstaki</i> strain YBT-1520 plasmid pBMB8513          | CP004864  | 8,513   |
| <i>B. thuringiensis</i> serovar <i>kurstaki</i> strain YBT-1520 plasmid pBMB8513          | CP007611  | 8,513   |
| <i>B. thuringiensis</i> serovar <i>kurstaki</i> strain YBT-1520 plasmid pBMB94            | CP004868  | 94,568  |
| <i>B. thuringiensis</i> serovar <i>kurstaki</i> strain YBT-1520 plasmid pBMB95            | CP007614  | 94,637  |
| <i>B. thuringiensis</i> serovar <i>kurstaki</i> strain YBT-1520 plasmid pBMB9741          | NC_001272 | 6,578   |
| <i>B. thuringiensis</i> serovar <i>kurstaki</i> strain HD-1 plasmid unnamed1              | CP009998  | 412,022 |
| <i>B. thuringiensis</i> serovar <i>kurstaki</i> strain HD-1 plasmid unnamed10             | CP010010  | 14,889  |
| <i>B. thuringiensis</i> serovar <i>kurstaki</i> strain HD-1 plasmid unnamed11             | CP010009  | 8,279   |
| <i>B. thuringiensis</i> serovar <i>kurstaki</i> strain HD-1 plasmid unnamed12             | CP010007  | 8,513   |
| <i>B. thuringiensis</i> serovar <i>kurstaki</i> strain HD-1 plasmid unnamed13             | CP010011  | 7,635   |
| <i>B. thuringiensis</i> serovar <i>kurstaki</i> strain HD-1 plasmid unnamed14             | CP010008  | 2,062   |
| <i>B. thuringiensis</i> serovar <i>kurstaki</i> strain HD-1 plasmid unnamed2              | CP009999  | 317,336 |
| <i>B. thuringiensis</i> serovar <i>kurstaki</i> strain HD-1 plasmid unnamed3              | CP010000  | 82,528  |
| <i>B. thuringiensis</i> serovar <i>kurstaki</i> strain HD-1 plasmid unnamed4              | CP010001  | 82,303  |

|                                                                                      |             |         |
|--------------------------------------------------------------------------------------|-------------|---------|
| <i>B. thuringiensis</i> serovar <i>kurstaki</i> strain HD-1 plasmid unnamed5         | CP010002    | 80,285  |
| <i>B. thuringiensis</i> serovar <i>kurstaki</i> strain HD-1 plasmid unnamed6         | CP010003    | 69,317  |
| <i>B. thuringiensis</i> serovar <i>kurstaki</i> strain HD-1 plasmid unnamed7         | CP010006    | 46,634  |
| <i>B. thuringiensis</i> serovar <i>kurstaki</i> strain HD-1 plasmid unnamed8         | CP010004    | 34,150  |
| <i>B. thuringiensis</i> serovar <i>kurstaki</i> strain HD-1 plasmid unnamed9         | CP010012    | 18,332  |
| <i>B. thuringiensis</i> serovar <i>morrisoni</i> strain BGSC 4AA1 plasmid pBMB232    | CP010578    | 232,994 |
| <i>B. thuringiensis</i> serovar <i>morrisoni</i> strain BGSC 4AA1 plasmid pBMB48     | CP010583    | 4,845   |
| <i>B. thuringiensis</i> serovar <i>morrisoni</i> strain BGSC 4AA1 plasmid pBMB51     | CP010582    | 51,723  |
| <i>B. thuringiensis</i> serovar <i>morrisoni</i> strain BGSC 4AA1 plasmid pBMB68     | CP010581    | 68,444  |
| <i>B. thuringiensis</i> serovar <i>morrisoni</i> strain BGSC 4AA1 plasmid pBMB76     | CP010580    | 76,979  |
| <i>B. thuringiensis</i> serovar <i>morrisoni</i> strain BGSC 4AA1 plasmid pBMB92     | CP010579    | 92,619  |
| <i>B. thuringiensis</i> serovar <i>rongseni</i> plasmid pBMB2062-56                  | NC_019227   | 2,062   |
| <i>B. thuringiensis</i> serovar <i>tenebrionis</i> plasmid pBMB175                   | NC_010895   | 14,841  |
| <i>B. thuringiensis</i> serovar <i>tenebrionis</i> strain YBT-1765 plasmid pBMB165   | NC_023074   | 77,627  |
| <i>B. thuringiensis</i> serovar <i>thuringiensis</i> strain IS5056 plasmid pIS56-107 | CP004134    | 107,431 |
| <i>B. thuringiensis</i> serovar <i>thuringiensis</i> strain IS5056 plasmid pIS56-11  | CP004127    | 11,331  |
| <i>B. thuringiensis</i> serovar <i>thuringiensis</i> strain IS5056 plasmid pIS56-15  | CP004128    | 15,185  |
| <i>B. thuringiensis</i> serovar <i>thuringiensis</i> strain IS5056 plasmid pIS56-16  | CP004129    | 16,206  |
| <i>B. thuringiensis</i> serovar <i>thuringiensis</i> strain IS5056 plasmid pIS56-233 | CP004135    | 233,730 |
| <i>B. thuringiensis</i> serovar <i>thuringiensis</i> strain IS5056 plasmid pIS56-285 | CP004136    | 285,459 |
| <i>B. thuringiensis</i> serovar <i>thuringiensis</i> strain IS5056 plasmid pIS56-328 | CP004137    | 328,151 |
| <i>B. thuringiensis</i> serovar <i>thuringiensis</i> strain IS5056 plasmid pIS56-39  | CP004130    | 39,749  |
| <i>B. thuringiensis</i> serovar <i>thuringiensis</i> strain IS5056 plasmid pIS56-6   | CP004124    | 6,880   |
| <i>B. thuringiensis</i> serovar <i>thuringiensis</i> strain IS5056 plasmid pIS56-63  | CP004131    | 63,864  |
| <i>B. thuringiensis</i> serovar <i>thuringiensis</i> strain IS5056 plasmid pIS56-68  | CP004132    | 68,616  |
| <i>B. thuringiensis</i> serovar <i>thuringiensis</i> strain IS5056 plasmid pIS56-8   | CP004125    | 8,251   |
| <i>B. thuringiensis</i> serovar <i>thuringiensis</i> strain IS5056 plasmid pIS56-85  | CP004133    | 85,134  |
| <i>B. thuringiensis</i> serovar <i>thuringiensis</i> strain IS5056 plasmid pIS56-9   | CP004126    | 9,671   |
| <i>B. thuringiensis</i> serovar <i>tolworthi</i> plasmid pKK1 DNA                    | NZ_AP014865 | 437,451 |
| <i>B. thuringiensis</i> serovar <i>tolworthi</i> plasmid pKK2 DNA                    | NZ_AP014866 | 293,217 |
| <i>B. thuringiensis</i> serovar <i>tolworthi</i> plasmid pKK3 DNA                    | NZ_AP014867 | 130,548 |
| <i>B. thuringiensis</i> serovar <i>tolworthi</i> plasmid pKK4 DNA                    | NZ_AP014868 | 54,355  |
| <i>B. thuringiensis</i> serovar <i>tolworthi</i> plasmid pKK5 DNA                    | NZ_AP014869 | 23,773  |
| <i>B. thuringiensis</i> serovar <i>tolworthi</i> plasmid pKK6 DNA                    | NZ_AP014870 | 14,827  |
| <i>B. thuringiensis</i> serovar <i>tolworthi</i> plasmid pKK7 DNA                    | NZ_AP014871 | 11,769  |
| <i>B. thuringiensis</i> serovar <i>tolworthi</i> plasmid pKK8 DNA                    | NZ_AP014872 | 7,812   |
| <i>B. thuringiensis</i> strain Al Hakam, plasmid pALH1                               | CP000486    | 55,939  |
| <i>B. thuringiensis</i> strain 97-27 plasmid                                         | CP010087    | 76,848  |
| <i>B. thuringiensis</i> strain Al Hakam plasmid pBTZ_1                               | NZ_CP009650 | 273,588 |
| <i>B. thuringiensis</i> strain Al Hakam plasmid pBTZ_2                               | NZ_CP009649 | 140,953 |
| <i>B. thuringiensis</i> strain Al Hakam plasmid pBTZ_3                               | NZ_CP009648 | 11,903  |
| <i>B. thuringiensis</i> strain Al Hakam plasmid pBTZ_4                               | NZ_CP009647 | 11,902  |
| <i>B. thuringiensis</i> strain Al Hakam plasmid pBTZ_5                               | NZ_CP009645 | 4,920   |
| <i>B. thuringiensis</i> strain Al Hakam plasmid pBTZ_6                               | NZ_CP009646 | 4,602   |
| <i>B. thuringiensis</i> strain Bc601 plasmid pBTBC1                                  | CP015151    | 14,888  |
| <i>B. thuringiensis</i> strain Bc601 plasmid pBTBC2                                  | CP015152    | 171,171 |
| <i>B. thuringiensis</i> strain Bc601 plasmid pBTBC3                                  | CP015153    | 42,357  |
| <i>B. thuringiensis</i> strain Bc601 plasmid pBTBC4                                  | CP015154    | 82,417  |
| <i>B. thuringiensis</i> strain Bc601 plasmid pBTBC5                                  | CP015155    | 83,987  |
| <i>B. thuringiensis</i> strain Bc601 plasmid pBTBC6                                  | CP015156    | 89,350  |
| <i>B. thuringiensis</i> strain Bt185 plasmid pBT1850007                              | CP014290    | 7,486   |
| <i>B. thuringiensis</i> strain Bt185 plasmid pBT1850012                              | CP014288    | 12,487  |
| <i>B. thuringiensis</i> strain Bt185 plasmid pBT1850042                              | CP014287    | 41,937  |
| <i>B. thuringiensis</i> strain Bt185 plasmid pBT1850046                              | CP014289    | 46,165  |
| <i>B. thuringiensis</i> strain Bt185 plasmid pBT1850054                              | CP014286    | 54,205  |
| <i>B. thuringiensis</i> strain Bt185 plasmid pBT1850055                              | CP014285    | 55,372  |
| <i>B. thuringiensis</i> strain Bt185 plasmid pBT1850294                              | CP014284    | 293,705 |
| <i>B. thuringiensis</i> strain Bt185 plasmid pBT1850636                              | CP014283    | 635,508 |
| <i>B. thuringiensis</i> strain CTC plasmid                                           | CP013273    | 25,529  |

|                                                                           |             |         |
|---------------------------------------------------------------------------|-------------|---------|
| <i>B. thuringiensis</i> strain HD-1011 plasmid 1                          | CP009336    | 358,965 |
| <i>B. thuringiensis</i> strain HD-1011 plasmid 2                          | CP009334    | 349,601 |
| <i>B. thuringiensis</i> strain HD-1011 plasmid 3                          | CP009332    | 82,340  |
| <i>B. thuringiensis</i> strain HD-1011 plasmid 4                          | CP009333    | 69,773  |
| <i>B. thuringiensis</i> strain HD-12 plasmid pHD120017                    | CP014848    | 17,228  |
| <i>B. thuringiensis</i> strain HD-12 plasmid pHD120038                    | CP014849    | 38,333  |
| <i>B. thuringiensis</i> strain HD-12 plasmid pHD120039                    | CP014850    | 39,023  |
| <i>B. thuringiensis</i> strain HD-12 plasmid pHD120112                    | CP014851    | 112,429 |
| <i>B. thuringiensis</i> strain HD-12 plasmid pHD120161                    | CP014852    | 161,353 |
| <i>B. thuringiensis</i> strain HD-12 plasmid pHD120345                    | CP014853    | 345,196 |
| <i>B. thuringiensis</i> strain HD-571 plasmid pBFQ                        | CP009599    | 55,939  |
| <i>B. thuringiensis</i> strain HD-682 plasmid pBGN_1                      | CP009719    | 14,648  |
| <i>B. thuringiensis</i> strain HD-682 plasmid pBGN_2                      | CP009718    | 56,203  |
| <i>B. thuringiensis</i> strain HD-682 plasmid pBGN_3                      | CP009717    | 7,243   |
| <i>B. thuringiensis</i> strain HS18-1 plasmid pHS18-1                     | CP012100    | 509,170 |
| <i>B. thuringiensis</i> strain HS18-1 plasmid pHS18-2                     | CP012101    | 337,579 |
| <i>B. thuringiensis</i> strain HS18-1 plasmid pHS18-3                     | CP012102    | 92,085  |
| <i>B. thuringiensis</i> strain HS18-1 plasmid pHS18-4                     | CP012103    | 94,695  |
| <i>B. thuringiensis</i> strain HS18-1 plasmid pHS18-5                     | CP012104    | 42,726  |
| <i>B. thuringiensis</i> strain HS18-1 plasmid pHS18-6                     | CP012105    | 14,336  |
| <i>B. thuringiensis</i> strain HS18-1 plasmid pHS18-7                     | CP012106    | 4,669   |
| <i>B. thuringiensis</i> strain HS18-1 plasmid pHS18-8                     | CP012107    | 8,287   |
| <i>B. thuringiensis</i> strain HS18-1 plasmid pHS18-9                     | CP012108    | 7,386   |
| <i>B. thuringiensis</i> strain INTA-FR7-4 plasmid pFR12                   | EU362917    | 12,095  |
| <i>B. thuringiensis</i> strain INTA-FR7-4 plasmid pFR12.5                 | EU362918    | 12,459  |
| <i>B. thuringiensis</i> strain INTA-FR7-4 plasmid pFR55                   | EU362919    | 55,712  |
| <i>B. thuringiensis</i> strain KNU-07 plasmid pBTKNU07-01                 | CP016589    | 514,994 |
| <i>B. thuringiensis</i> strain KNU-07 plasmid pBTKNU07-02                 | CP016590    | 293,592 |
| <i>B. thuringiensis</i> strain MYBT18246 plasmid p101287                  | CP015356    | 101,287 |
| <i>B. thuringiensis</i> strain MYBT18246 plasmid p109822                  | CP015355    | 109,822 |
| <i>B. thuringiensis</i> strain MYBT18246 plasmid p120416                  | CP015354    | 120,416 |
| <i>B. thuringiensis</i> strain MYBT18246 plasmid p120510                  | CP015353    | 120,510 |
| <i>B. thuringiensis</i> strain MYBT18246 plasmid p142098                  | CP015352    | 142,098 |
| <i>B. thuringiensis</i> strain MYBT18246 plasmid p14456                   | NZ_CP015360 | 14,456  |
| <i>B. thuringiensis</i> strain MYBT18246 plasmid p150790                  | CP015351    | 150,791 |
| <i>B. thuringiensis</i> strain MYBT18246 plasmid p17175                   | NZ_CP015359 | 17,175  |
| <i>B. thuringiensis</i> strain MYBT18246 plasmid p46701                   | CP015358    | 46,701  |
| <i>B. thuringiensis</i> strain MYBT18246 plasmid p55166                   | NZ_CP015357 | 55,166  |
| <i>B. thuringiensis</i> strain MYBT18246 plasmid p6330                    | CP015361    | 6,330   |
| <i>B. thuringiensis</i> strain YC-10 plasmid pYC1                         | CP011350    | 761,374 |
| <i>B. thuringiensis</i> strain YC-10 plasmid pYC10                        | CP011355    | 14,894  |
| <i>B. thuringiensis</i> strain YC-10 plasmid pYC11                        | CP011356    | 7,129   |
| <i>B. thuringiensis</i> strain YC-10 plasmid pYC20                        | CP011357    | 90,519  |
| <i>B. thuringiensis</i> strain YC-10 plasmid pYC2226                      | CP011358    | 82,300  |
| <i>B. thuringiensis</i> strain YC-10 plasmid pYC3                         | CP011351    | 80,704  |
| <i>B. thuringiensis</i> strain YC-10 plasmid pYC4                         | CP011352    | 46,634  |
| <i>B. thuringiensis</i> strain YC-10 plasmid pYC5                         | CP011353    | 17,063  |
| <i>B. thuringiensis</i> strain YC-10 plasmid pYC6                         | CP011354    | 8,511   |
| <i>B. thuringiensis</i> strain YWC2-8 plasmid pYWC2-8-1                   | CP013056    | 250,706 |
| <i>B. thuringiensis</i> strain YWC2-8 plasmid pYWC2-8-2                   | CP013057    | 84,491  |
| <i>B. thuringiensis</i> strain YWC2-8 plasmid pYWC2-8-3                   | CP013058    | 82,531  |
| <i>B. thuringiensis</i> strain YWC2-8 plasmid pYWC2-8-4                   | CP013059    | 80,699  |
| <i>B. thuringiensis</i> strain YWC2-8 plasmid pYWC2-8-5                   | CP013060    | 46,634  |
| <i>B. thuringiensis</i> strain YWC2-8 plasmid pYWC2-8-6                   | CP013061    | 8,512   |
| <i>B. thuringiensis</i> sv <i>darmstadiensis</i> INTA 14-4 plasmid pBMBt1 | NC_006821   | 6,700   |
| <i>B. thuringiensis</i> sv <i>entomocidus</i> LBIT-113 plasmid pUIBI-1    | NC_004059   | 4,671   |
| <i>B. thuringiensis</i> sv <i>israelensis</i> HI4 plasmid pTX14-3         | NC_001446   | 7,649   |
| <i>B. thuringiensis</i> sv <i>israelensis</i> plasmid pTX14-1             | NC_002091   | 5,415   |
| <i>B. thuringiensis</i> sv <i>thuringiensis</i> H1.1 plasmid pGI1         | NC_004335   | 8,254   |

|                                                         |           |         |
|---------------------------------------------------------|-----------|---------|
| <i>B. thuringiensis</i> YBT-1518 plasmid pBMB0228       | NC_020124 | 17,706  |
| <i>B. thuringiensis</i> YBT-1518 plasmid pBMB0229       | CP005936  | 45,206  |
| <i>B. thuringiensis</i> YBT-1518 plasmid pBMB0230       | CP005937  | 49,195  |
| <i>B. thuringiensis</i> YBT-1518 plasmid pBMB0231       | CP005938  | 146,276 |
| <i>B. thuringiensis</i> YBT-1518 plasmid pBMB0232       | CP005939  | 171,593 |
| <i>B. thuringiensis</i> YBT-1518 plasmid pBMB0233       | CP005940  | 240,661 |
| <i>B. thuringiensis, kurstaki</i> HD-3a3b               | NC_007202 | 2,058   |
| <i>B. toyonensis</i> BCT-7112 plasmid pBCT77            | CP006864  | 76,974  |
| <i>B. toyonensis</i> BCT-7112 plasmid pBCT8             | CP006865  | 7,971   |
| <i>B. weihenstephanensis</i> KBAB4 plasmid pBWB401      | CP000904  | 417,054 |
| <i>B. weihenstephanensis</i> KBAB4 plasmid pBWB402      | CP000905  | 75,107  |
| <i>B. weihenstephanensis</i> KBAB4 plasmid pBWB403      | CP000906  | 64,977  |
| <i>B. weihenstephanensis</i> KBAB4 plasmid pBWB404      | CP000907  | 52,830  |
| <i>B. thuringiensis</i> strain XL6 plasmid              | CP013001  | 393,620 |
| <i>B. cereus</i> strain FORC021 plasmid                 | CP014487  | 41,600  |
| <i>B. cereus</i> strain M3 plasmid pBCM301              | CP016317  | 229,356 |
| <i>B. cereus</i> strain M13 plasmid pBCM1301            | CP016361  | 87,088  |
| <i>B. cereus</i> strain M13 plasmid pBCM1302            | CP016362  | 11,745  |
| <i>B. cereus</i> strain M13 plasmid pBCM1303            | CP016363  | 3,088   |
| <i>B. cereus</i> strain K8 plasmid pBCM301              | CP016596  | 319,570 |
| <i>B. cereus</i> strain K8 plasmid pBCK802              | CP016597  | 71,854  |
| <i>B. thuringiensis</i> strain SCG04-02 plasmid PSCG61  | CP017573  | 61,350  |
| <i>B. thuringiensis</i> strain SCG04-02 plasmid PSCG364 | CP017574  | 364,037 |
| <i>B. thuringiensis</i> strain SCG04-02 plasmid PSCG11  | CP017575  | 11,179  |
| <i>B. thuringiensis</i> strain SCG04-02 plasmid PSCG5   | CP017576  | 5,650   |
| <i>B. cereus</i> strain FORC_047 plasmid pFORC47_1      | CP018741  | 257,708 |
| <i>B. cereus</i> strain FORC_047 plasmid pFORC47_2      | CP018742  | 213,830 |
| <i>B. cereus</i> strain ISSFR-3F plasmid unnamed        | CP018932  | 97,731  |
| <i>B. cereus</i> strain ISSFR-9F plasmid unnamed1       | CP018934  | 97,634  |
| <i>B. cereus</i> strain JEM-2 plasmid unnamed1          | CP018936  | 94,665  |
| <i>B. thuringiensis</i> strain YGD22-03 plasmid pYGD30  | CP019231  | 30,343  |
| <i>B. thuringiensis</i> strain YGD22-03 plasmid pYGD36  | CP019232  | 36,974  |
| <i>B. thuringiensis</i> strain YGD22-03 plasmid pYGD5   | CP019233  | 5,650   |
| <i>B. thuringiensis</i> strain YGD22-03 plasmid pYGD83  | CP019234  | 83,894  |
| <i>B. thuringiensis</i> strain YGD22-03 plasmid pYGD98  | CP019235  | 98,137  |
| <i>B. thuringiensis</i> strain L-7601 plasmid unnamed1  | CP020003  | 55,336  |
| <i>B. thuringiensis</i> strain L-7601 plasmid unnamed2  | CP020004  | 49,952  |
| <i>B. thuringiensis</i> strain L-7601 plasmid unnamed3  | CP020005  | 408,071 |
| <i>B. mycoides</i> strain Gnyt1 plasmid unnamed1        | CP020744  | 460,379 |
| <i>B. mycoides</i> strain Gnyt1 plasmid unnamed2        | CP020745  | 114,265 |
| <i>B. mycoides</i> strain Gnyt1 plasmid unnamed3        | CP020746  | 102,550 |
| <i>B. mycoides</i> strain Gnyt1 plasmid unnamed4        | CP020747  | 82,671  |
| <i>B. mycoides</i> strain Gnyt1 plasmid unnamed5        | CP020748  | 73,408  |
| <i>B. mycoides</i> strain Gnyt1 plasmid unnamed6        | CP020749  | 64,682  |
| <i>B. mycoides</i> strain Gnyt1 plasmid unnamed7        | CP020750  | 51,563  |
| <i>B. mycoides</i> strain Gnyt1 plasmid unnamed8        | CP020751  | 10,665  |
| <i>B. cereus</i> strain BC-AK plasmid pBC244 sequence   | CP020938  | 244,929 |
| <i>B. cereus</i> strain BC-AK plasmid pBC52 sequence    | CP020939  | 52,693  |
| <i>B. cereus</i> strain BC-AK plasmid pBCXO1 sequence   | CP020940  | 168,378 |
| <i>B. cereus</i> strain BC-AK plasmid pBCXO2 sequence   | CP020941  | 88,621  |
| <i>B. thuringiensis</i> strain ATCC 10792 plasmid poh1  | CP021062  | 584,623 |
| <i>B. thuringiensis</i> strain ATCC 10792 plasmid poh2  | CP021063  | 113,294 |
| <i>B. thuringiensis</i> strain ATCC 10792 plasmid poh3  | CP021064  | 92,949  |
| <i>B. thuringiensis</i> strain ATCC 10792 plasmid poh4  | CP021065  | 86,488  |
| <i>B. thuringiensis</i> strain ATCC 10792 plasmid poh5  | CP021066  | 11,332  |

---



**Table S2.** Open reading frames (ORFs) in the ~120 kb plasmid region covering the insecticidal pathogenicity island (PAI) from *B. thuringiensis* IS5056 plasmid pIS56-285 (CP004136). ORFs were annotated using Blast2GO software.

| ORF                                         | Length [aa] | GO category <sup>a</sup>                                                                                                                                                                                                                                       | Enzyme Codes |
|---------------------------------------------|-------------|----------------------------------------------------------------------------------------------------------------------------------------------------------------------------------------------------------------------------------------------------------------|--------------|
| 20 kDa in cryBP1 5'-region (ORF1) (plasmid) | 88          |                                                                                                                                                                                                                                                                |              |
| Transposase                                 | 431         | F: DNA binding<br>P: transposition<br>P: DNA recombination<br>P: DNA integration<br>F: ATP binding                                                                                                                                                             |              |
| Transposase                                 | 250         |                                                                                                                                                                                                                                                                |              |
| 20 kDa in cryBP1 5'-region (ORF1) (plasmid) | 123         |                                                                                                                                                                                                                                                                |              |
| pBt10 (plasmid)                             | 81          |                                                                                                                                                                                                                                                                |              |
| Holin                                       | 140         | C: integral component of membrane                                                                                                                                                                                                                              |              |
| N-hydroxyarylamine O-acetyltransferase      | 104         | P: acyl-carrier-protein biosynthetic process<br>F: N-hydroxyarylamine O-acetyltransferase activity                                                                                                                                                             | EC:2.3.1.118 |
| N-hydroxyarylamine O-acetyltransferase      | 72          | P: acyl-carrier-protein biosynthetic process<br>F: N-hydroxyarylamine O-acetyltransferase activity                                                                                                                                                             | EC:2.3.1.118 |
| DUF3221 domain-containing                   | 134         |                                                                                                                                                                                                                                                                |              |
| 1-phosphatidylinositol phosphodiesterase    | 41          | F: phosphatidylinositol diacylglycerol-lyase activity<br>P: lipid metabolic process<br>C: membrane<br>C: integral component of membrane<br>F: lyase activity<br>F: phosphoric diester hydrolase activity                                                       |              |
| Cell filamentation Fic                      | 349         |                                                                                                                                                                                                                                                                |              |
| Membrane                                    | 42          | C: integral component of membrane                                                                                                                                                                                                                              |              |
| N-hydroxyarylamine O-acetyltransferase      | 51          | P: acyl-carrier-protein biosynthetic process<br>F: N-hydroxyarylamine O-acetyltransferase activity                                                                                                                                                             | EC:2.3.1.118 |
| Uncharacterised                             | 51          |                                                                                                                                                                                                                                                                |              |
| IS605 family transposase                    | 372         |                                                                                                                                                                                                                                                                |              |
| transposase                                 | 132         | F: DNA binding<br>F: transposase activity<br>P: transposition, DNA-mediated<br>C: integral component of membrane                                                                                                                                               |              |
| Membrane                                    | 100         |                                                                                                                                                                                                                                                                |              |
| N-hydroxyarylamine O-acetyltransferase      | 280         | P: acyl-carrier-protein biosynthetic process<br>F: N-hydroxyarylamine O-acetyltransferase activity                                                                                                                                                             | EC:2.3.1.118 |
| Lumazine binding domain (plasmid)           | 48          | C: nucleus<br>C: cytosol                                                                                                                                                                                                                                       |              |
| IS4 family transposase                      | 473         | F: DNA binding<br>F: transposase activity<br>C: integral component of membrane<br>P: transposition, DNA-mediated<br>C: integral component of membrane                                                                                                          |              |
| Membrane (plasmid)                          | 37          |                                                                                                                                                                                                                                                                |              |
| ADP-ribosyltransferase                      | 178         | C: extracellular region<br>F: transferase activity<br>P: pathogenesis                                                                                                                                                                                          |              |
| ADP ribosyltransferase                      | 94          | F: transferase activity, transferring glycosyl groups<br>C: extracellular region<br>P: pathogenesis                                                                                                                                                            |              |
| IS4 family transposase                      | 476         | F: DNA binding<br>F: transposase activity<br>C: integral component of membrane<br>P: transposition, DNA-mediated<br>C: integral component of membrane                                                                                                          |              |
| Family transporter                          | 290         |                                                                                                                                                                                                                                                                |              |
| Hypothetical protein H175_285p028 (plasmid) | 40          |                                                                                                                                                                                                                                                                |              |
| Exosporium leader peptide                   | 338         |                                                                                                                                                                                                                                                                |              |
| Transcriptional regulator                   | 99          | F: DNA binding<br>C: transcription factor complex<br>F: transcription factor activity, sequence-specific<br>DNA binding<br>P: regulation of transcription, DNA-templated<br>P: regulation of transcription, DNA-templated<br>C: integral component of membrane |              |
| Transposase                                 | 237         |                                                                                                                                                                                                                                                                |              |
| pXO1-04 (plasmid)                           | 209         |                                                                                                                                                                                                                                                                |              |
| Membrane (plasmid)                          | 211         | C: integral component of membrane                                                                                                                                                                                                                              |              |
| pXO1-02 (plasmid)                           | 204         | F: RNA-directed DNA polymerase activity<br>C: integral component of membrane<br>P: RNA-dependent DNA biosynthetic process                                                                                                                                      | EC:2.7.7.49  |

|                                             |     |                                                                                                                                                                                                                                                                          |              |
|---------------------------------------------|-----|--------------------------------------------------------------------------------------------------------------------------------------------------------------------------------------------------------------------------------------------------------------------------|--------------|
| Hypothetical protein                        | 194 |                                                                                                                                                                                                                                                                          |              |
| Hypothetical protein                        | 127 | C: integral component of membrane                                                                                                                                                                                                                                        |              |
| pXO1-01 (plasmid)                           | 212 |                                                                                                                                                                                                                                                                          |              |
| Membrane (plasmid)                          | 37  | C: integral component of membrane                                                                                                                                                                                                                                        |              |
| NADH dehydrogenase                          | 66  | C: integral component of membrane                                                                                                                                                                                                                                        |              |
| NADH dehydrogenase                          | 57  | C: integral component of membrane                                                                                                                                                                                                                                        |              |
| DNA topoisomerase I                         | 887 | F: DNA binding<br>F: metal ion binding<br>F: DNA topoisomerase type I activity<br>P: DNA topological change<br>P: pathogenesis                                                                                                                                           | EC:5.99.1.2  |
| Thermonuclease (plasmid)                    | 214 | F: nucleic acid binding<br>P: nucleic acid phosphodiester bond hydrolysis<br>F: nuclease activity                                                                                                                                                                        |              |
| pXO1-140 (plasmid)                          | 95  |                                                                                                                                                                                                                                                                          |              |
| Pyruvate decarboxylase                      | 152 | F: magnesium ion binding<br>F: thiamine pyrophosphate binding<br>F: DNA binding<br>P: transcription, DNA-templated<br>F: catalytic activity<br>P: regulation of transcription, DNA-templated<br>F: carboxy-lyase activity                                                |              |
| Disulfide bond formation B                  | 145 | P: obsolete electron transport<br>F: protein disulfide oxidoreductase activity<br>C: integral component of membrane<br>P: oxidation-reduction process<br>C: plasma membrane                                                                                              |              |
| Family transcriptional regulator            | 97  | F: DNA binding<br>C: transcription factor complex<br>F: transcription factor activity, sequence-specific<br>DNA binding<br>P: regulation of transcription, DNA-templated<br>P: regulation of transcription, DNA-templated<br>P: phosphorylation<br>F: kinase activity    |              |
| Histidine kinase                            | 363 |                                                                                                                                                                                                                                                                          |              |
| (Plasmid)                                   | 44  |                                                                                                                                                                                                                                                                          |              |
| Transposase (plasmid)                       | 93  |                                                                                                                                                                                                                                                                          |              |
| pXO1-134 (plasmid)                          | 125 |                                                                                                                                                                                                                                                                          |              |
| Hypothetical protein                        | 171 |                                                                                                                                                                                                                                                                          |              |
| Recombinase                                 | 332 | F: DNA binding<br>P: DNA recombination<br>P: DNA integration                                                                                                                                                                                                             |              |
| Hypothetical protein CT43_P281221 (plasmid) | 109 |                                                                                                                                                                                                                                                                          |              |
| Cobalamin synthesis P47K (plasmid)          | 137 |                                                                                                                                                                                                                                                                          |              |
| N-hydroxyarylamine O-acetyltransferase      | 271 | P: acyl-carrier-protein biosynthetic process<br>F: N-hydroxyarylamine O-acetyltransferase activity                                                                                                                                                                       | EC:2.3.1.118 |
| Transposase                                 | 273 | F: nucleic acid binding<br>P: DNA integration                                                                                                                                                                                                                            |              |
| Transposase                                 | 226 | F: transposase activity<br>F: sequence-specific DNA binding<br>P: transposition, DNA-mediated<br>F: isomerase activity                                                                                                                                                   |              |
| DNA topoisomerase I                         | 46  |                                                                                                                                                                                                                                                                          |              |
| Transposase                                 | 134 | F: DNA binding<br>F: transposase activity<br>P: transposition, DNA-mediated<br>F: DNA binding<br>P: carbohydrate metabolic process<br>C: membrane<br>C: integral component of membrane<br>F: hydrolase activity, hydrolyzing O-glycosyl compounds; F: hydrolase activity |              |
| Aldo keto reductase                         | 98  |                                                                                                                                                                                                                                                                          |              |
| Transposase (plasmid)                       | 372 |                                                                                                                                                                                                                                                                          |              |
| 4-oxalomesaconate tautomerase               | 357 | F: methylitaconate delta-isomerase activity                                                                                                                                                                                                                              | EC:5.3.3.6   |
| EamA-like transporter family                | 303 | C: integral component of membrane                                                                                                                                                                                                                                        |              |
| IS605 family transposase                    | 37  | F: DNA binding                                                                                                                                                                                                                                                           |              |
| IS605 family transposase                    | 372 |                                                                                                                                                                                                                                                                          |              |
| Hemolysin BL lytic component L2             | 439 | C: membrane<br>P: pathogenesis                                                                                                                                                                                                                                           |              |
| Hemolysin BL lytic component L1             | 409 | C: integral component of membrane<br>P: pathogenesis                                                                                                                                                                                                                     |              |
| Hemolysin BL-binding component              | 377 | C: membrane<br>P: pathogenesis                                                                                                                                                                                                                                           |              |
| DNA replication (plasmid)                   | 55  | F: ATP binding                                                                                                                                                                                                                                                           |              |

|                                                      |     |                                                                                                                                                                                                                           |
|------------------------------------------------------|-----|---------------------------------------------------------------------------------------------------------------------------------------------------------------------------------------------------------------------------|
| Spore coat (plasmid)                                 | 43  | F: DNA binding<br>F: transposase activity<br>C: viral capsid<br>P: transposition, DNA-mediated                                                                                                                            |
| Cobalt chelatase                                     | 67  | C: membrane<br>C: integral component of membrane<br>P: cobalamin biosynthetic process<br>F: cobaltochelatase activity<br>F: ligase activity                                                                               |
| IS6 family transposase                               | 61  | F: nucleic acid binding<br>P: DNA integration                                                                                                                                                                             |
| IS6 family transposase                               | 37  | F: nucleic acid binding<br>C: integral component of membrane<br>P: DNA integration                                                                                                                                        |
| Hypothetical protein                                 | 331 |                                                                                                                                                                                                                           |
| Hypothetical protein H175_285p252 (plasmid)          | 40  |                                                                                                                                                                                                                           |
| Family transcriptional regulator                     | 89  | F: DNA binding<br>C: transcription factor complex<br>F: transcription factor activity, sequence-specific<br>DNA binding<br>P: regulation of transcription, DNA-templated<br>P: regulation of transcription, DNA-templated |
| Immunity                                             | 200 | C: integral component of membrane<br>P: response to toxic substance                                                                                                                                                       |
| SdpA family antimicrobial peptide system             | 176 | C: membrane<br>C: integral component of membrane                                                                                                                                                                          |
| Sporulation-delaying protein SdpB                    | 316 | C: integral component of membrane                                                                                                                                                                                         |
| SdpC family antimicrobial peptide                    | 206 | C: membrane<br>C: integral component of membrane<br>P: phosphorylation<br>F: kinase activity                                                                                                                              |
| Thiol-disulfide oxidoreductase                       | 130 |                                                                                                                                                                                                                           |
| Amidohydrolase                                       | 438 | F: hydrolase activity, acting on carbon-nitrogen<br>(but not peptide) bonds<br>P: nitrogen compound metabolic process<br>C: integral component of membrane                                                                |
| Membrane                                             | 177 |                                                                                                                                                                                                                           |
| Hypothetical protein H175_285p261 (plasmid)          | 37  |                                                                                                                                                                                                                           |
| Family transcriptional regulator                     | 296 | F: DNA binding<br>C: transcription factor complex<br>F: transcription factor activity, sequence-specific<br>DNA binding<br>P: regulation of transcription, DNA-templated<br>P: regulation of transcription, DNA-templated |
| Transposase (plasmid)                                | 122 |                                                                                                                                                                                                                           |
| IS605 family transposase                             | 245 |                                                                                                                                                                                                                           |
| Hypothetical protein H175_285p265 (plasmid)          | 41  |                                                                                                                                                                                                                           |
| Hypothetical protein                                 | 150 |                                                                                                                                                                                                                           |
| Transposase                                          | 120 |                                                                                                                                                                                                                           |
| Transposase                                          | 47  |                                                                                                                                                                                                                           |
| Transposase                                          | 120 |                                                                                                                                                                                                                           |
| Transposase DDE domain (plasmid)                     | 49  |                                                                                                                                                                                                                           |
| Transposase for IS660 (plasmid)                      | 44  | C: membrane<br>C: integral component of membrane<br>P: regulation of transcription, DNA-templated                                                                                                                         |
| M trans-acting positive regulator (Mga)<br>(plasmid) | 471 |                                                                                                                                                                                                                           |
| Transposase                                          | 47  |                                                                                                                                                                                                                           |
| Transposase (plasmid)                                | 64  |                                                                                                                                                                                                                           |
| IS605 family transposase                             | 47  |                                                                                                                                                                                                                           |
| Vegetative insecticidal                              | 789 | F: hydrolase activity, acting on glycosyl bonds                                                                                                                                                                           |
| Helix-turn-helix domain-containing partial           | 94  |                                                                                                                                                                                                                           |
| IS605 family partial                                 | 38  |                                                                                                                                                                                                                           |
| IS605 family transposase                             | 77  |                                                                                                                                                                                                                           |
| N-acetylmuramoyl-L-alanine amidase (plasmid)         | 39  | P: peptidoglycan catabolic process<br>F: N-acetylmuramoyl-L-alanine amidase activity<br>F: hydrolase activity                                                                                                             |
| Crystal protein cry2Ab                               | 633 | P: signal transduction<br>P: defence response<br>F: receptor binding<br>P: pathogenesis<br>P: sporulation resulting in formation of a cellular<br>spore                                                                   |
| Hypothetical protein H175_285p282 (plasmid)          | 40  |                                                                                                                                                                                                                           |
| Hypothetical protein H175_285p283 (plasmid)          | 55  | C: integral component of membrane                                                                                                                                                                                         |

|                                              |      |                                                                                                                                                      |             |
|----------------------------------------------|------|------------------------------------------------------------------------------------------------------------------------------------------------------|-------------|
| Methyl-accepting chemotaxis                  | 532  | P: chemotaxis<br>P: signal transduction<br>C: integral component of membrane<br>F: signal transducer activity                                        |             |
| Potassium transporter                        | 164  | P: potassium ion transport<br>P: cation transmembrane transport<br>F: cation transmembrane transporter activity                                      |             |
| Potassium transporter                        | 399  | F: solute: proton antiporter activity<br>C: integral component of membrane<br>P: hydrogen ion transmembrane transport<br>P: regulation of pH         |             |
| N-acetylmuramoyl-L-alanine amidase (plasmid) | 316  | P: peptidoglycan catabolic process<br>P: peptidoglycan biosynthetic process<br>F: N-acetylmuramoyl-L-alanine amidase activity                        | EC:3.5.1.28 |
| Crystal protein cry1Aa (plasmid)             | 1176 | P: signal transduction<br>P: defence response<br>F: receptor binding<br>P: pathogenesis<br>P: sporulation resulting in formation of a cellular spore |             |
| Cry1Ia                                       | 719  | P: signal transduction<br>P: defence response<br>F: receptor binding<br>P: pathogenesis<br>P: sporulation resulting in formation of a cellular spore |             |
| Tyrosine recombinase                         | 368  | F: DNA binding<br>P: DNA recombination<br>P: DNA integration                                                                                         |             |
| Appr-1-p processing                          | 341  |                                                                                                                                                      |             |
| Hypothetical protein                         | 210  |                                                                                                                                                      |             |
| Hypothetical protein H175_285p293 (plasmid)  | 39   |                                                                                                                                                      |             |
| Transposase                                  | 44   | F: DNA binding<br>F: transposase activity<br>P: transposition, DNA-mediated                                                                          |             |
| Hypothetical protein                         | 42   | C: integral component of membrane                                                                                                                    |             |
| Cry2Aa (plasmid)                             | 633  | P: signal transduction<br>P: defence response<br>F: receptor binding<br>P: pathogenesis<br>P: sporulation resulting in formation of a cellular spore |             |
| CryBP1 5'-region                             | 252  |                                                                                                                                                      |             |

<sup>a</sup>GO, Gene Ontology; P - biological process; F - molecular function; C - cellular component



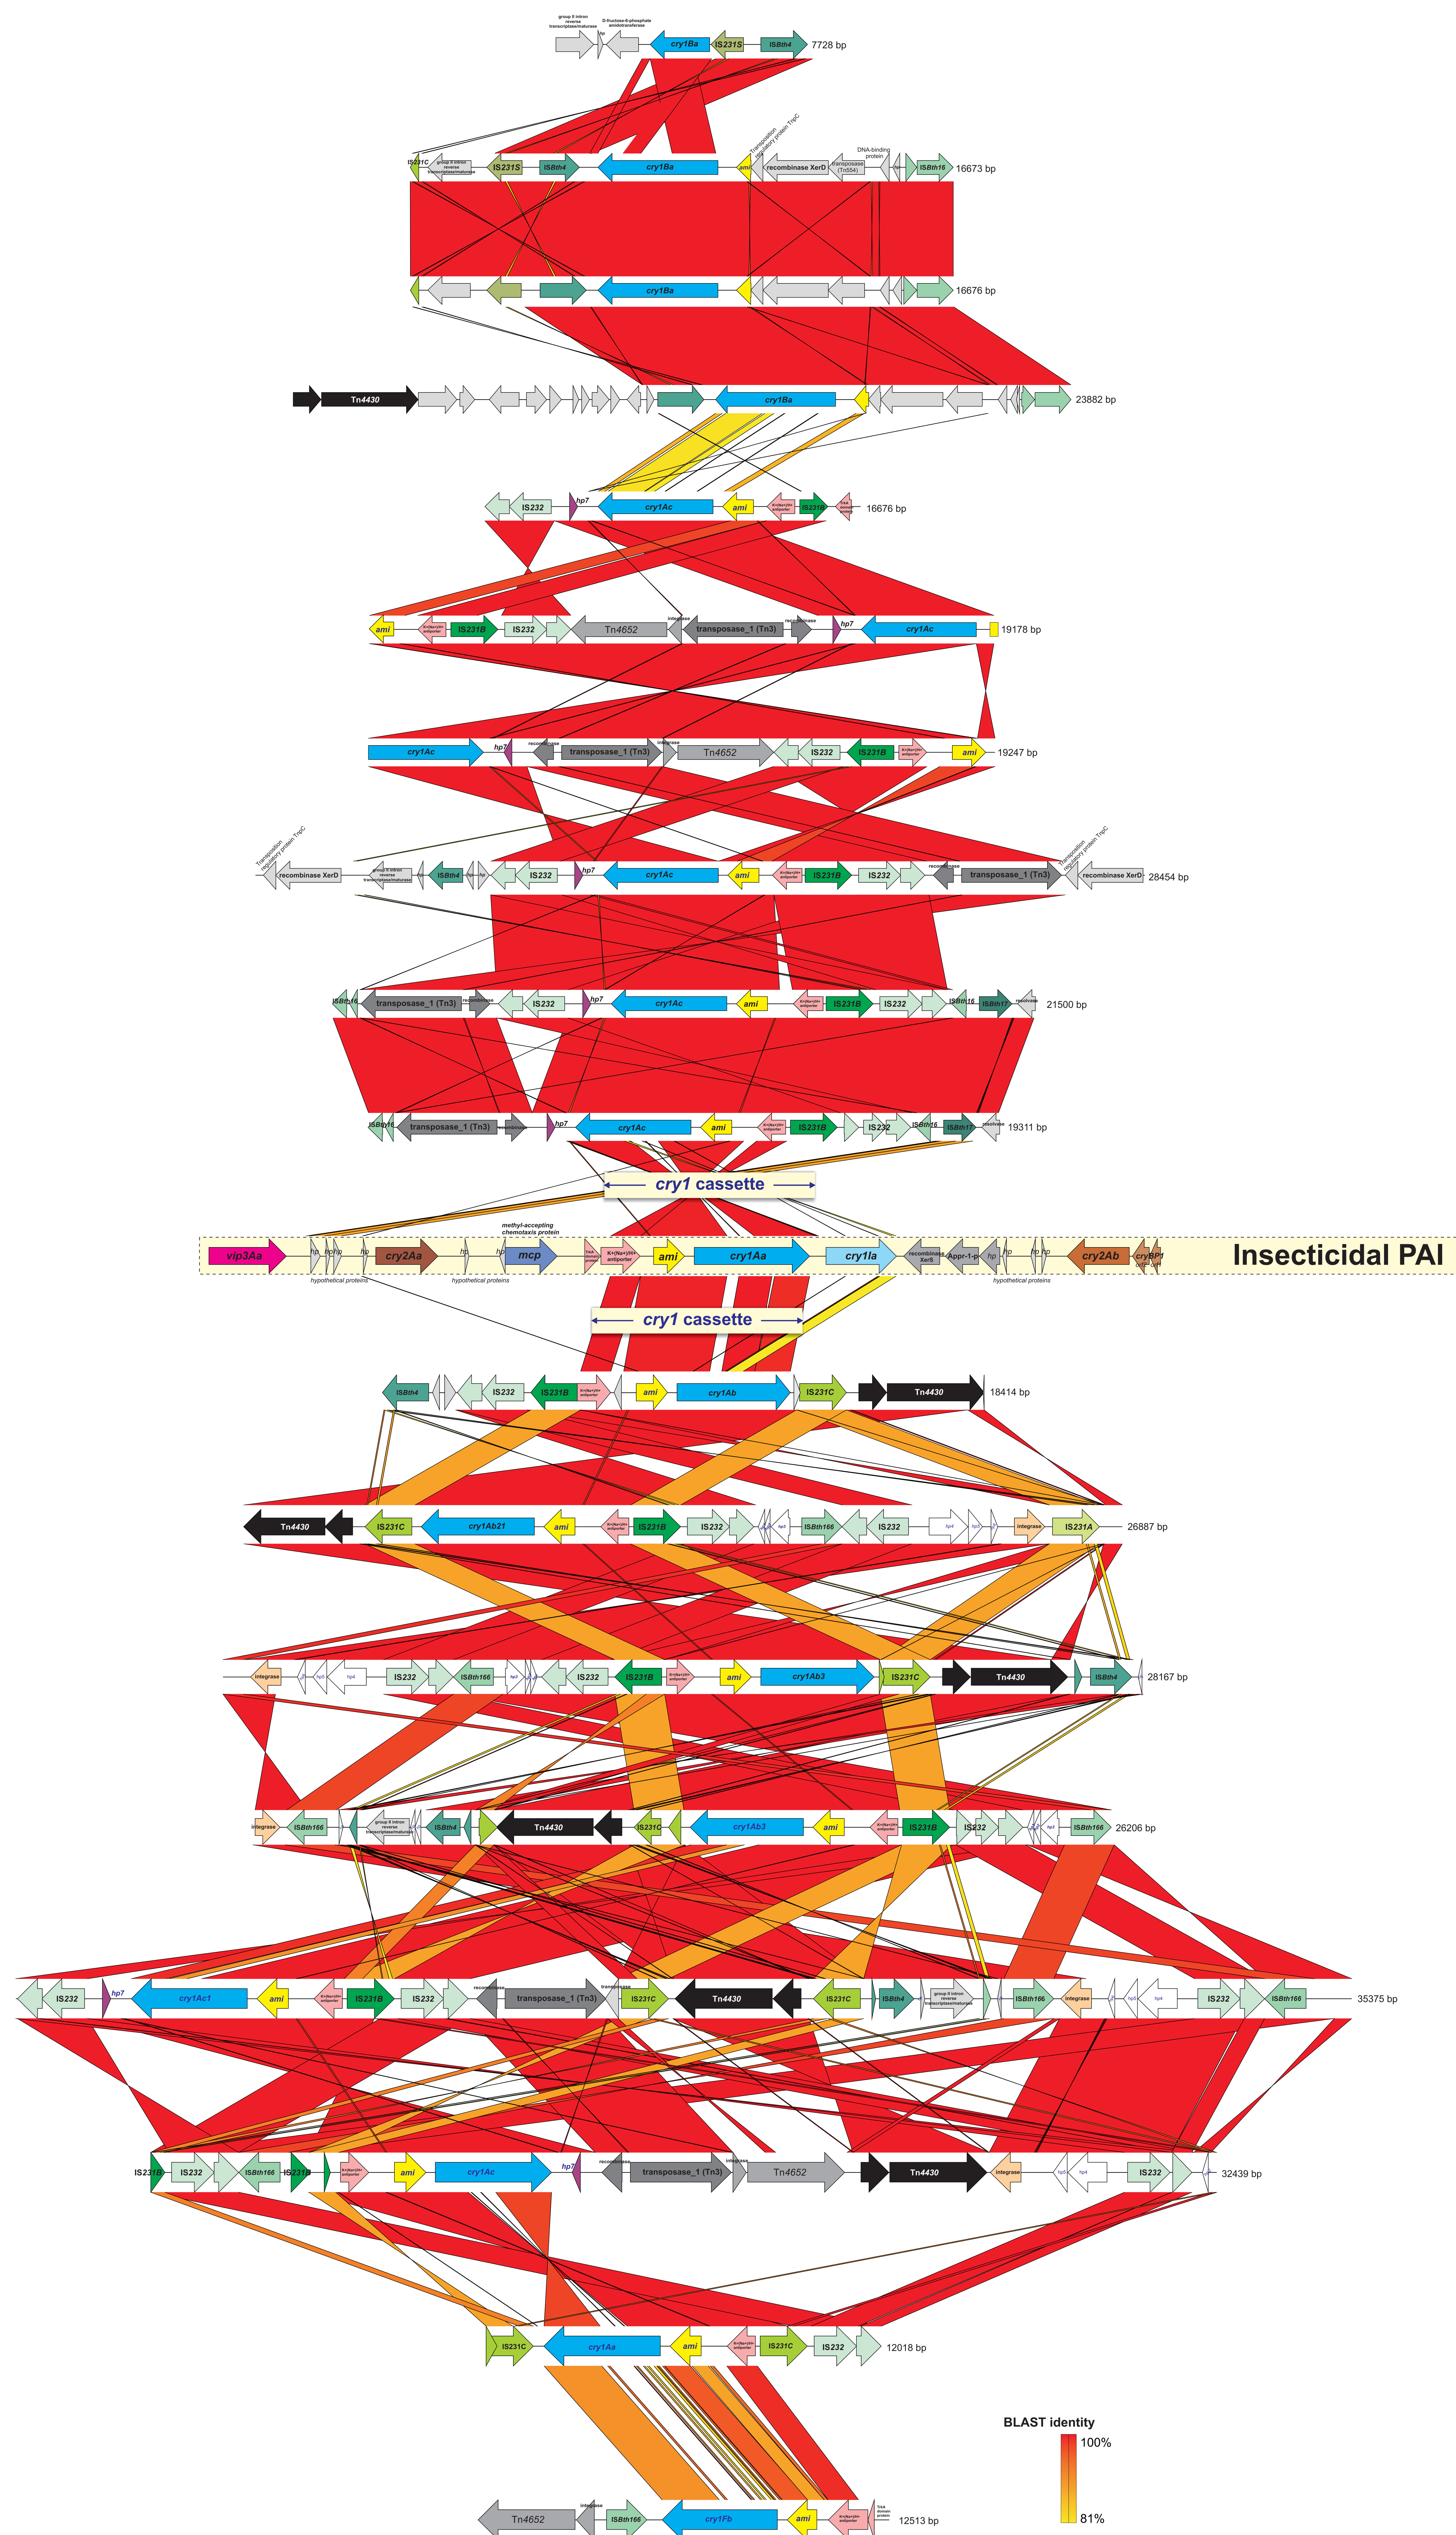

<sup>a</sup>an additional *cry1A* gene located outside of the PAI

| <i>B. thuringiensis</i> strains and plasmids<br>(GenBank Accession number) | <i>cry1</i> type | Replication type                  |
|----------------------------------------------------------------------------|------------------|-----------------------------------|
| CT-43 plasmid pBMB0558<br>(NC_014937)                                      | <i>cry1Ba</i>    | ori60                             |
| <i>chinensis</i> CT-43 plasmid pCT127<br>(CP001908)                        | <i>cry1Ba</i>    |                                   |
| <i>thuringiensis</i> IS5056 plasmid pIS56-107<br>(CP004134)                | <i>cry1Ba</i>    |                                   |
| <i>berliner</i> ATCC 10792 plasmid poh2<br>(CP021063)                      | <i>cry1Ba</i>    |                                   |
| <i>kurstaki</i> HD-1 plasmid pBMB95<br>(CP004875)                          | <i>cry1Ac</i>    | ori60                             |
| <i>kurstaki</i> YBT-1520 plasmid pBMB94<br>(CP004868)                      | <i>cry1Ac</i>    |                                   |
| <i>kurstaki</i> YBT-1520 plasmid pBMB95<br>(CP007614)                      | <i>cry1Ac</i>    |                                   |
| <i>galleriae</i> HD-29 plasmid pBMB126<br>(CP010092)                       | <i>cry1Ac</i>    |                                   |
| YC-10 plasmid pYC1<br>(CP011350) <sup>a</sup>                              | <i>cry1Ac</i>    | ori156/orf157,<br>pXO1-16/pXO1-14 |
| YWC2-8 plasmid pYWC2-8-1<br>(CP013056)                                     | <i>cry1Ac</i>    |                                   |
| <i>kurstaki</i> HD-1 plasmid unnamed2<br>(CP009999) <sup>a</sup>           | <i>cry1Ac</i>    |                                   |
| <i>berliner</i> ATCC 10792 plasmid poh4<br>(CP021065)                      | <i>cry1Ab</i>    |                                   |
| <i>thuringiensis</i> IS5056 plasmid pIS56-63<br>(CP004131)                 | <i>cry1Ab21</i>  | ori43                             |
| <i>kurstaki</i> HD-1 plasmid pBMB65<br>(CP004873)                          | <i>cry1Ab3</i>   |                                   |
| <i>kurstaki</i> HD-1 plasmid unnamed6<br>(CP010003)                        | <i>cry1Ab3</i>   |                                   |
| <i>kurstaki</i> HD-73 plasmid pHT73<br>(CP004070)                          | <i>cry1Ac1</i>   |                                   |
| <i>kurstaki</i> YBT-1520 plasmid pBMB69<br>(CP007613)                      | <i>cry1Ac</i>    | ori44                             |
| HD-771 plasmid p03<br>(CP003755)                                           | <i>cry1Aa</i>    |                                   |
| HD-12 plasmid pHD120161<br>(CP014852)                                      | <i>cry1Fb</i>    |                                   |
|                                                                            | <i>repA</i>      |                                   |

**Fig. S2.** The *cry1* gene cassette in *B. thuringiensis* plasmids. The insecticidal pathogenicity island (PAI) was used as the reference.

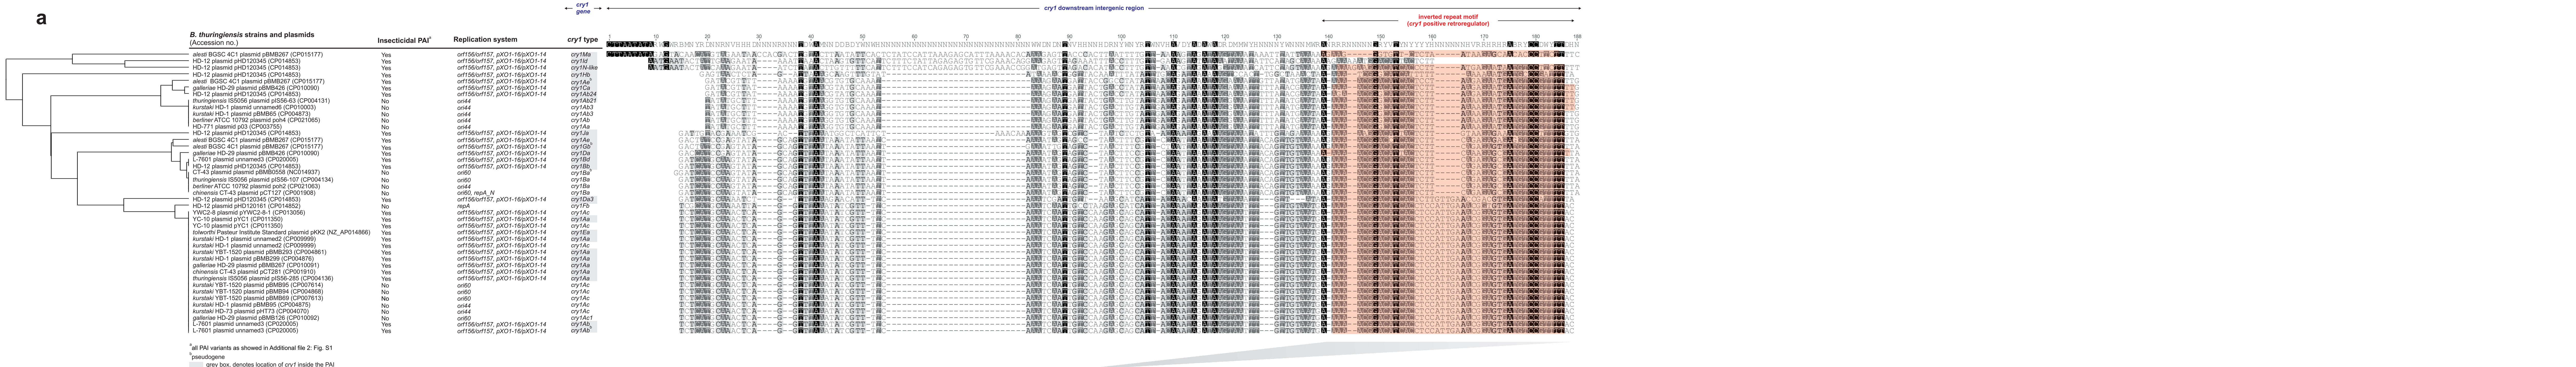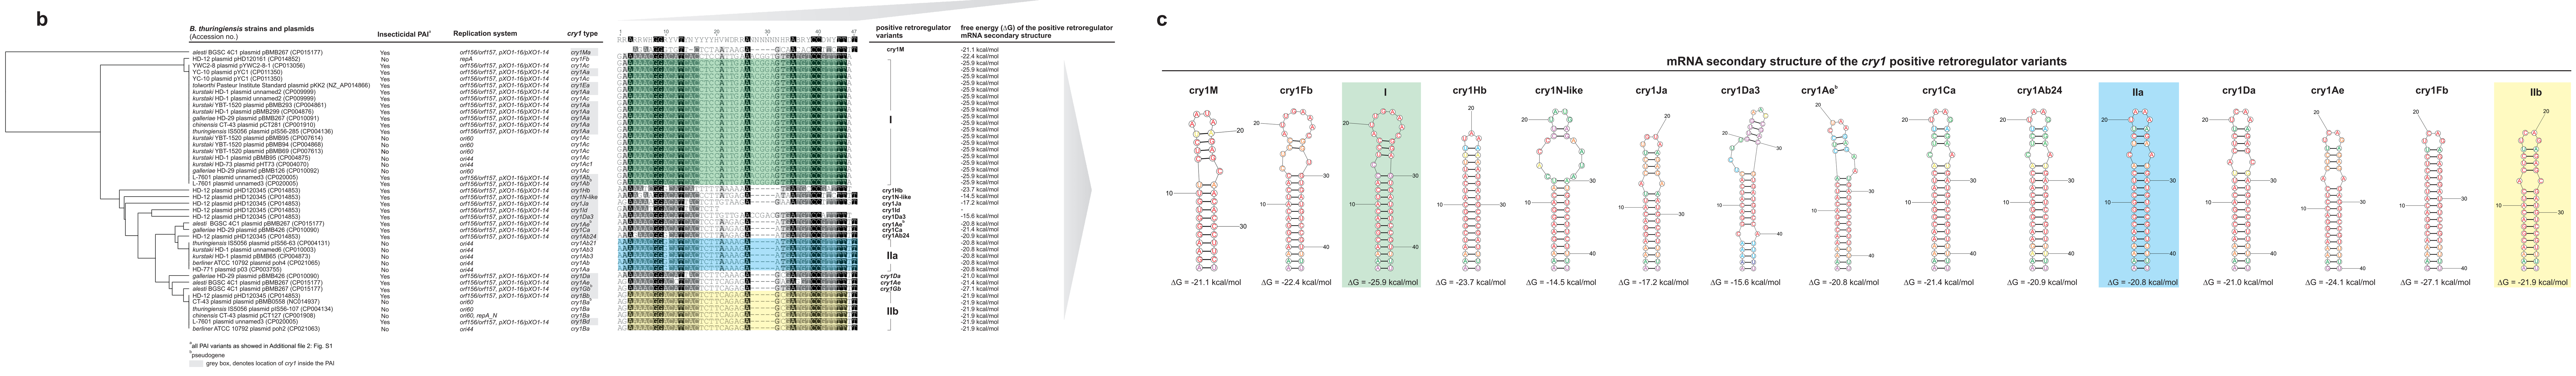

**Fig. S3. (a)** Alignment of the downstream region of *cry1* genes containing the positive retroregulator. **(b)** Comparison of sequence identity of the positive retroregulator between various *cry1* genes using UPGMA clustering method. **(c)** Prediction of the lowest free energy structure for mRNA of various variants of the *cry1* positive retroregulator. The analysis was done using RNA structure web server (<http://ma.urmc.rochester.edu/RNAstructureWeb/Servers/Predict1/Predict1.html>).

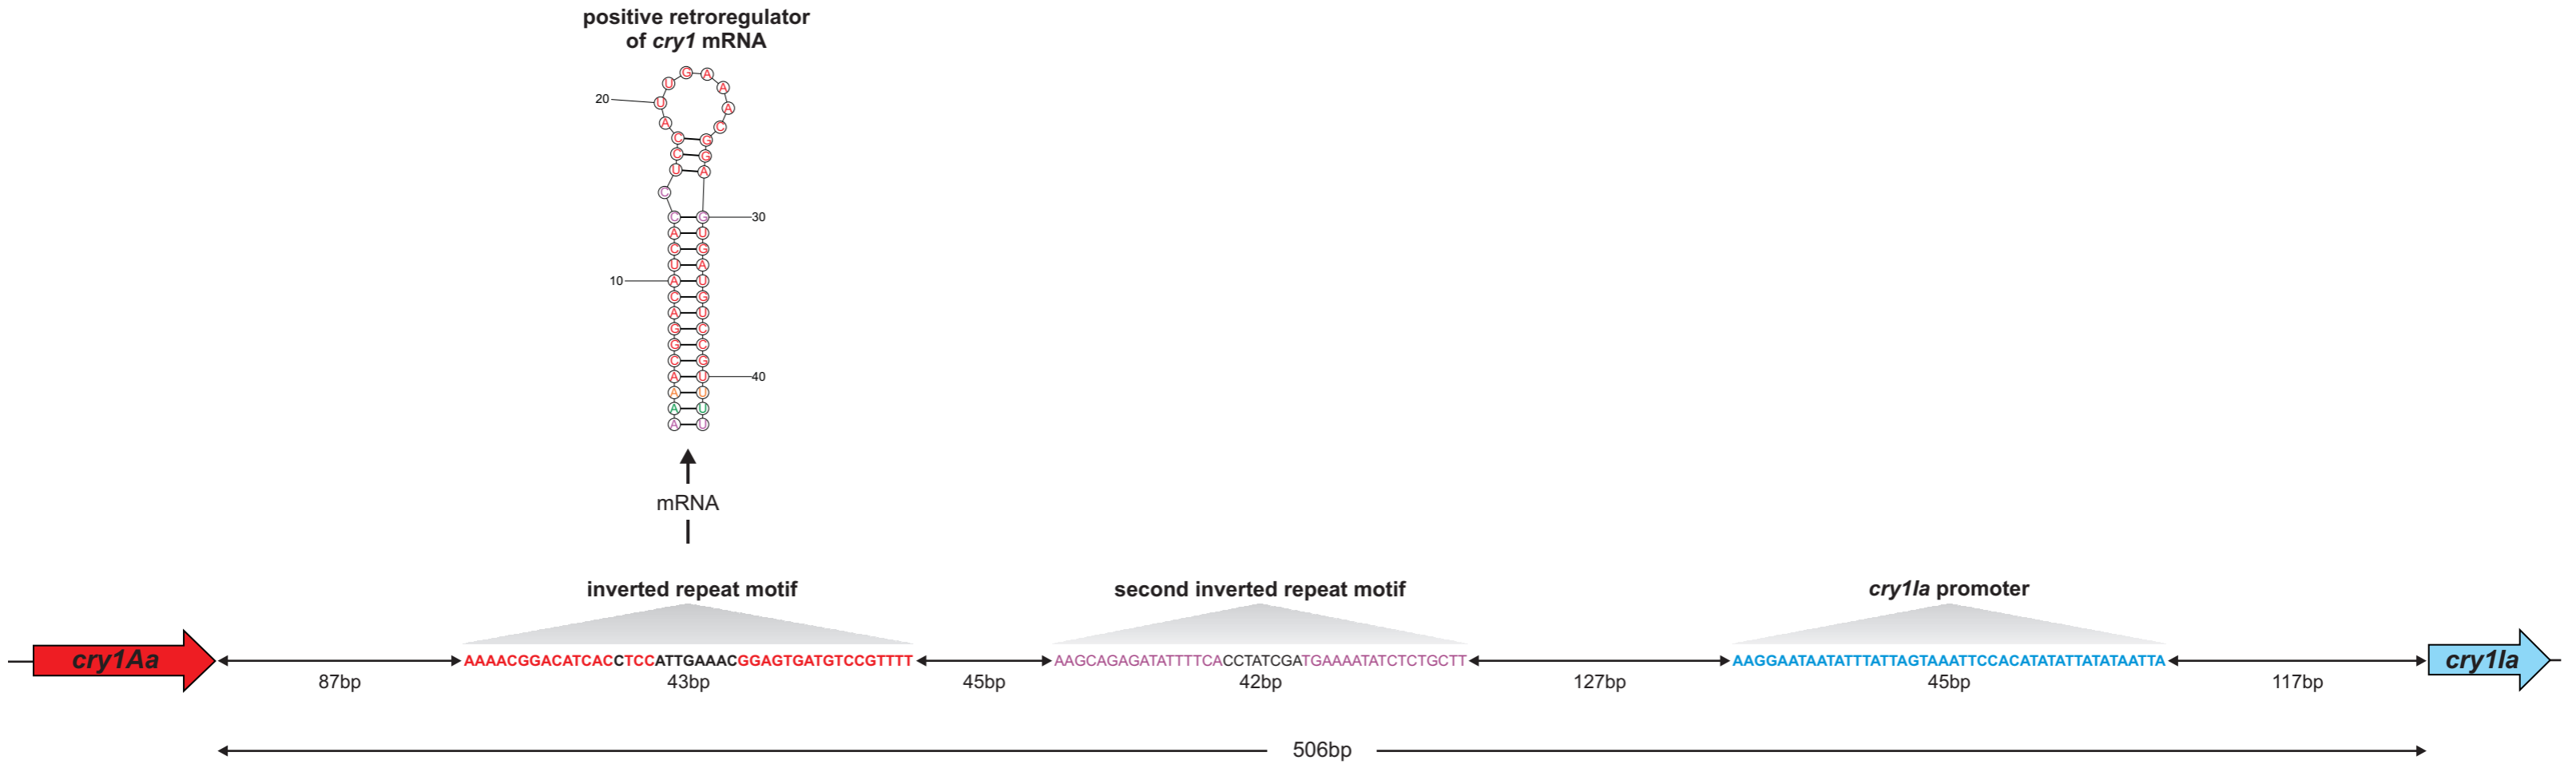

**Fig. S4.** Intergenic region between *cry1Aa* and *cry1a* from the insecticidal PAI (plasmid pBMB299, GenBank Acc. no. CP004876, was used as the reference sequence).



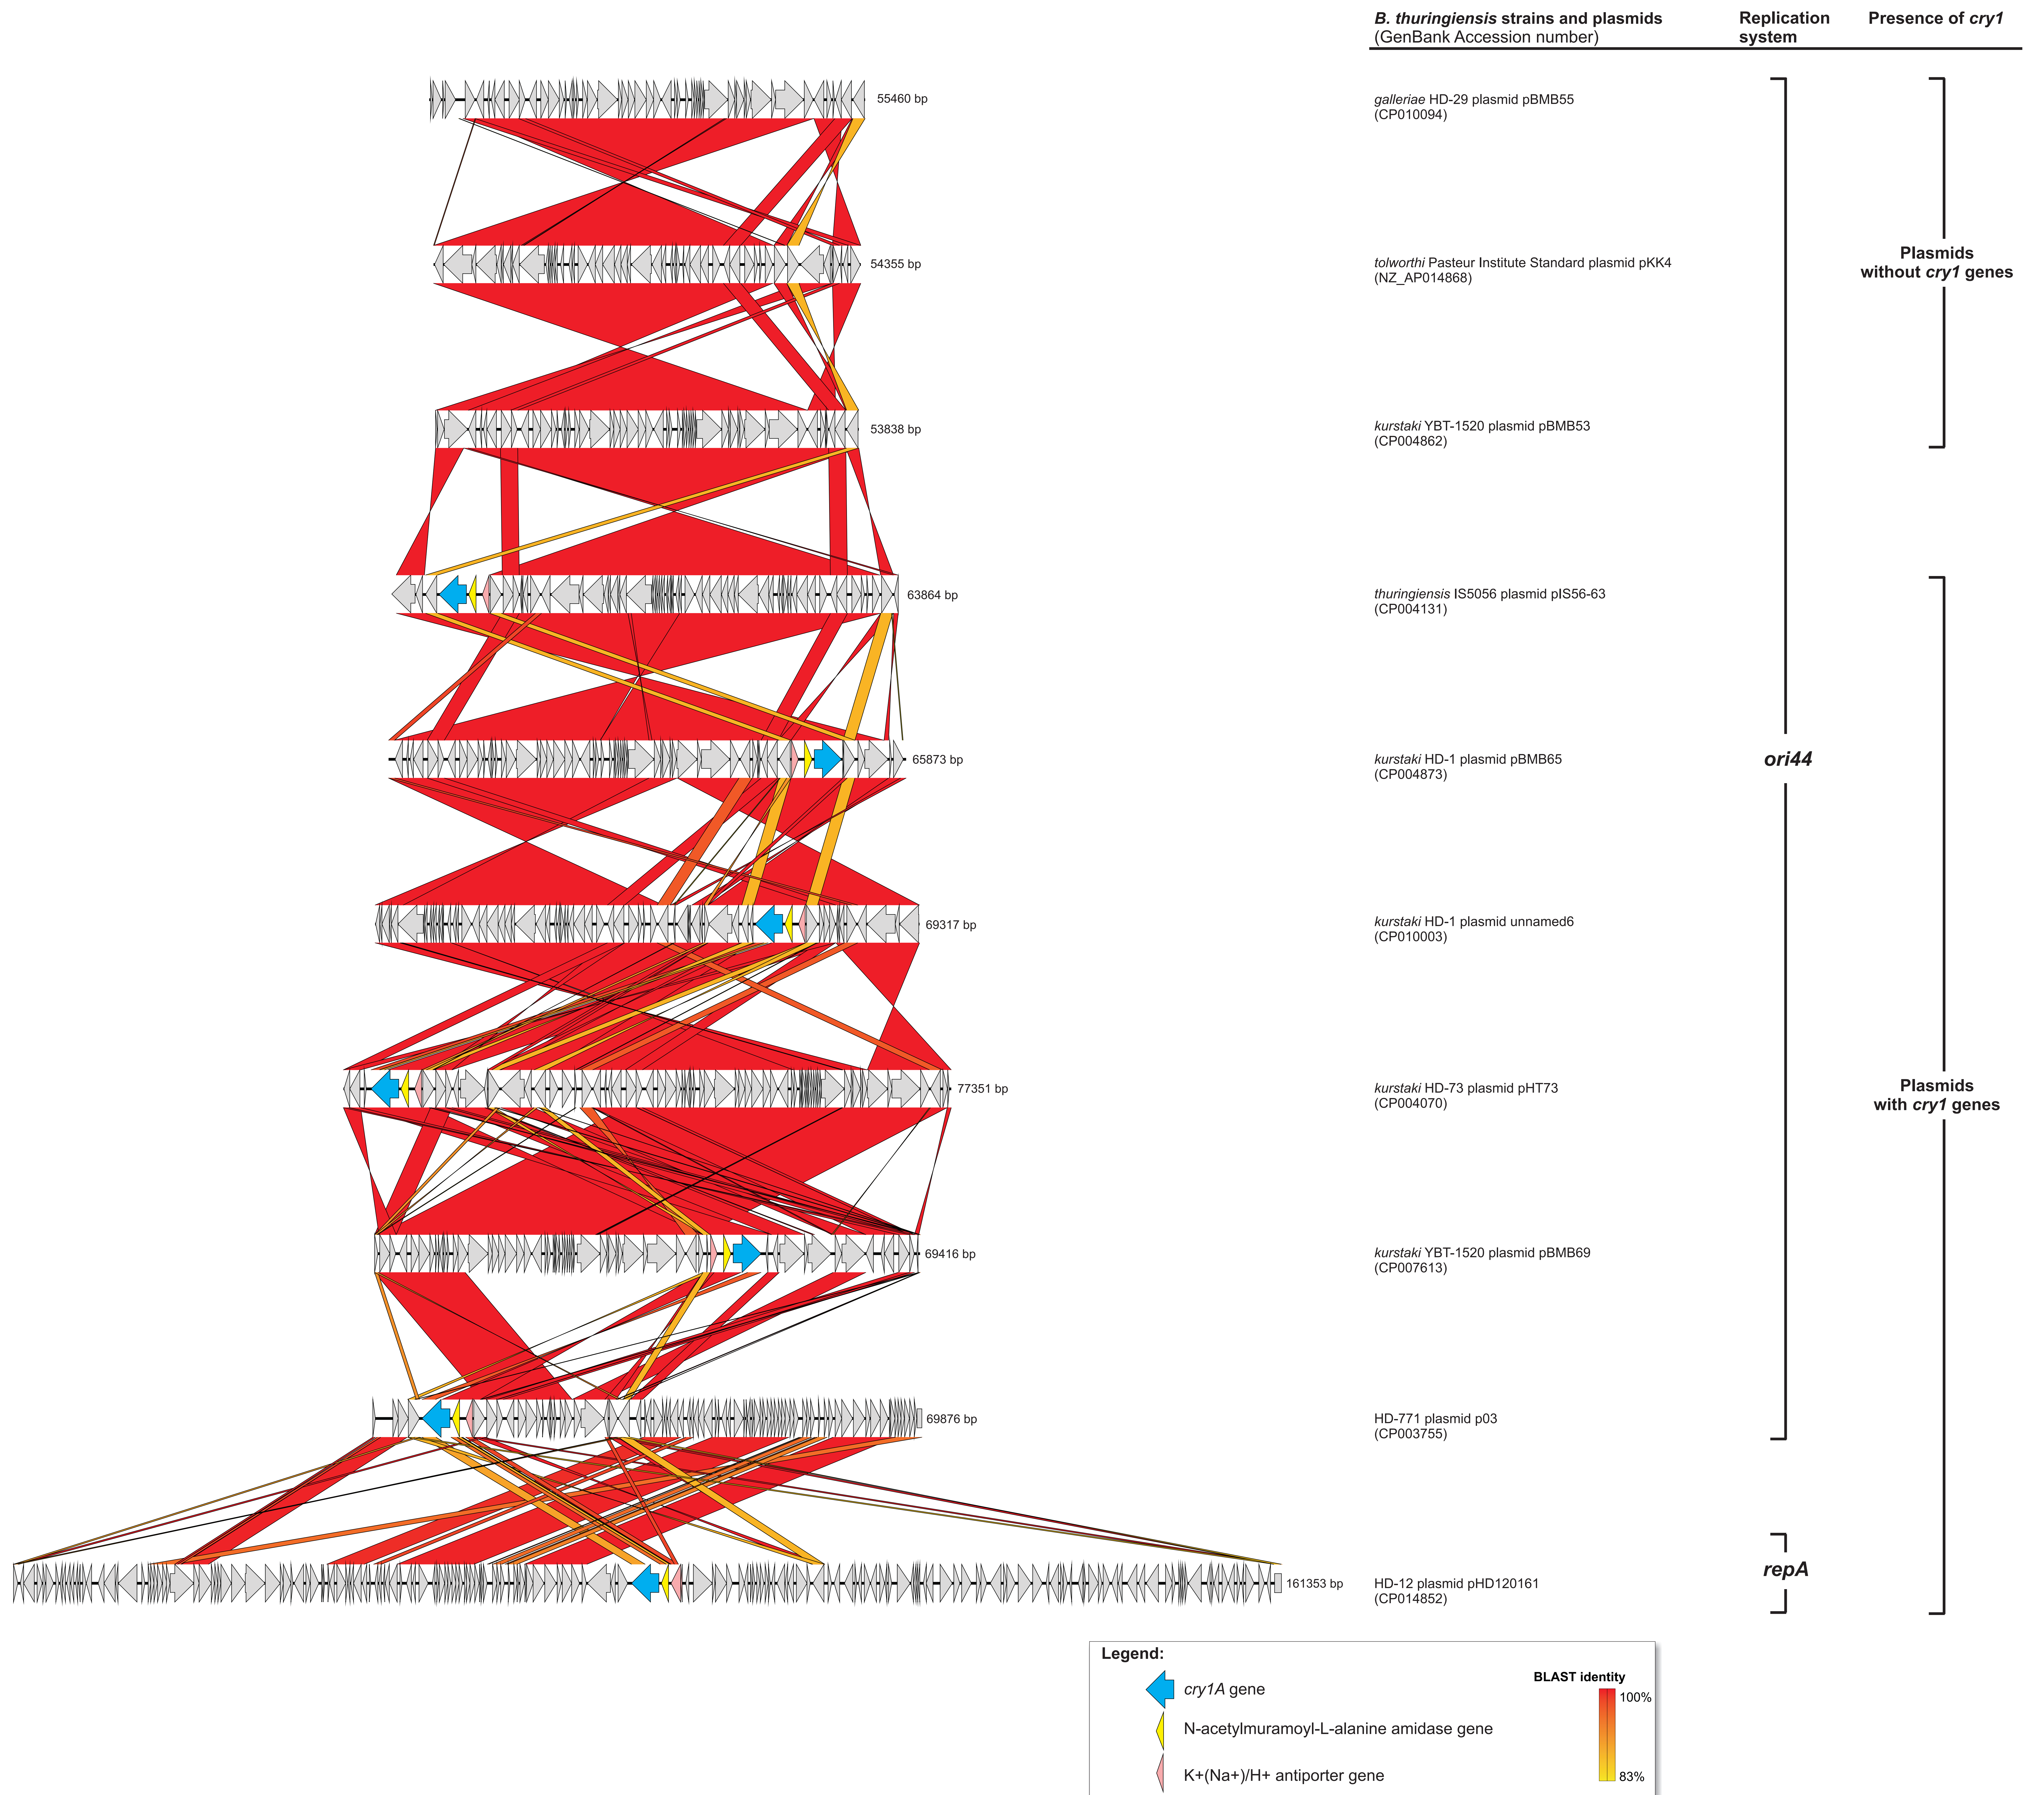

**Fig. S5.** Comparison of plasmids with *ori44* and *repA* replication systems carrying *cry1A* or *cry1F* with related plasmids missing *cry1* genes.

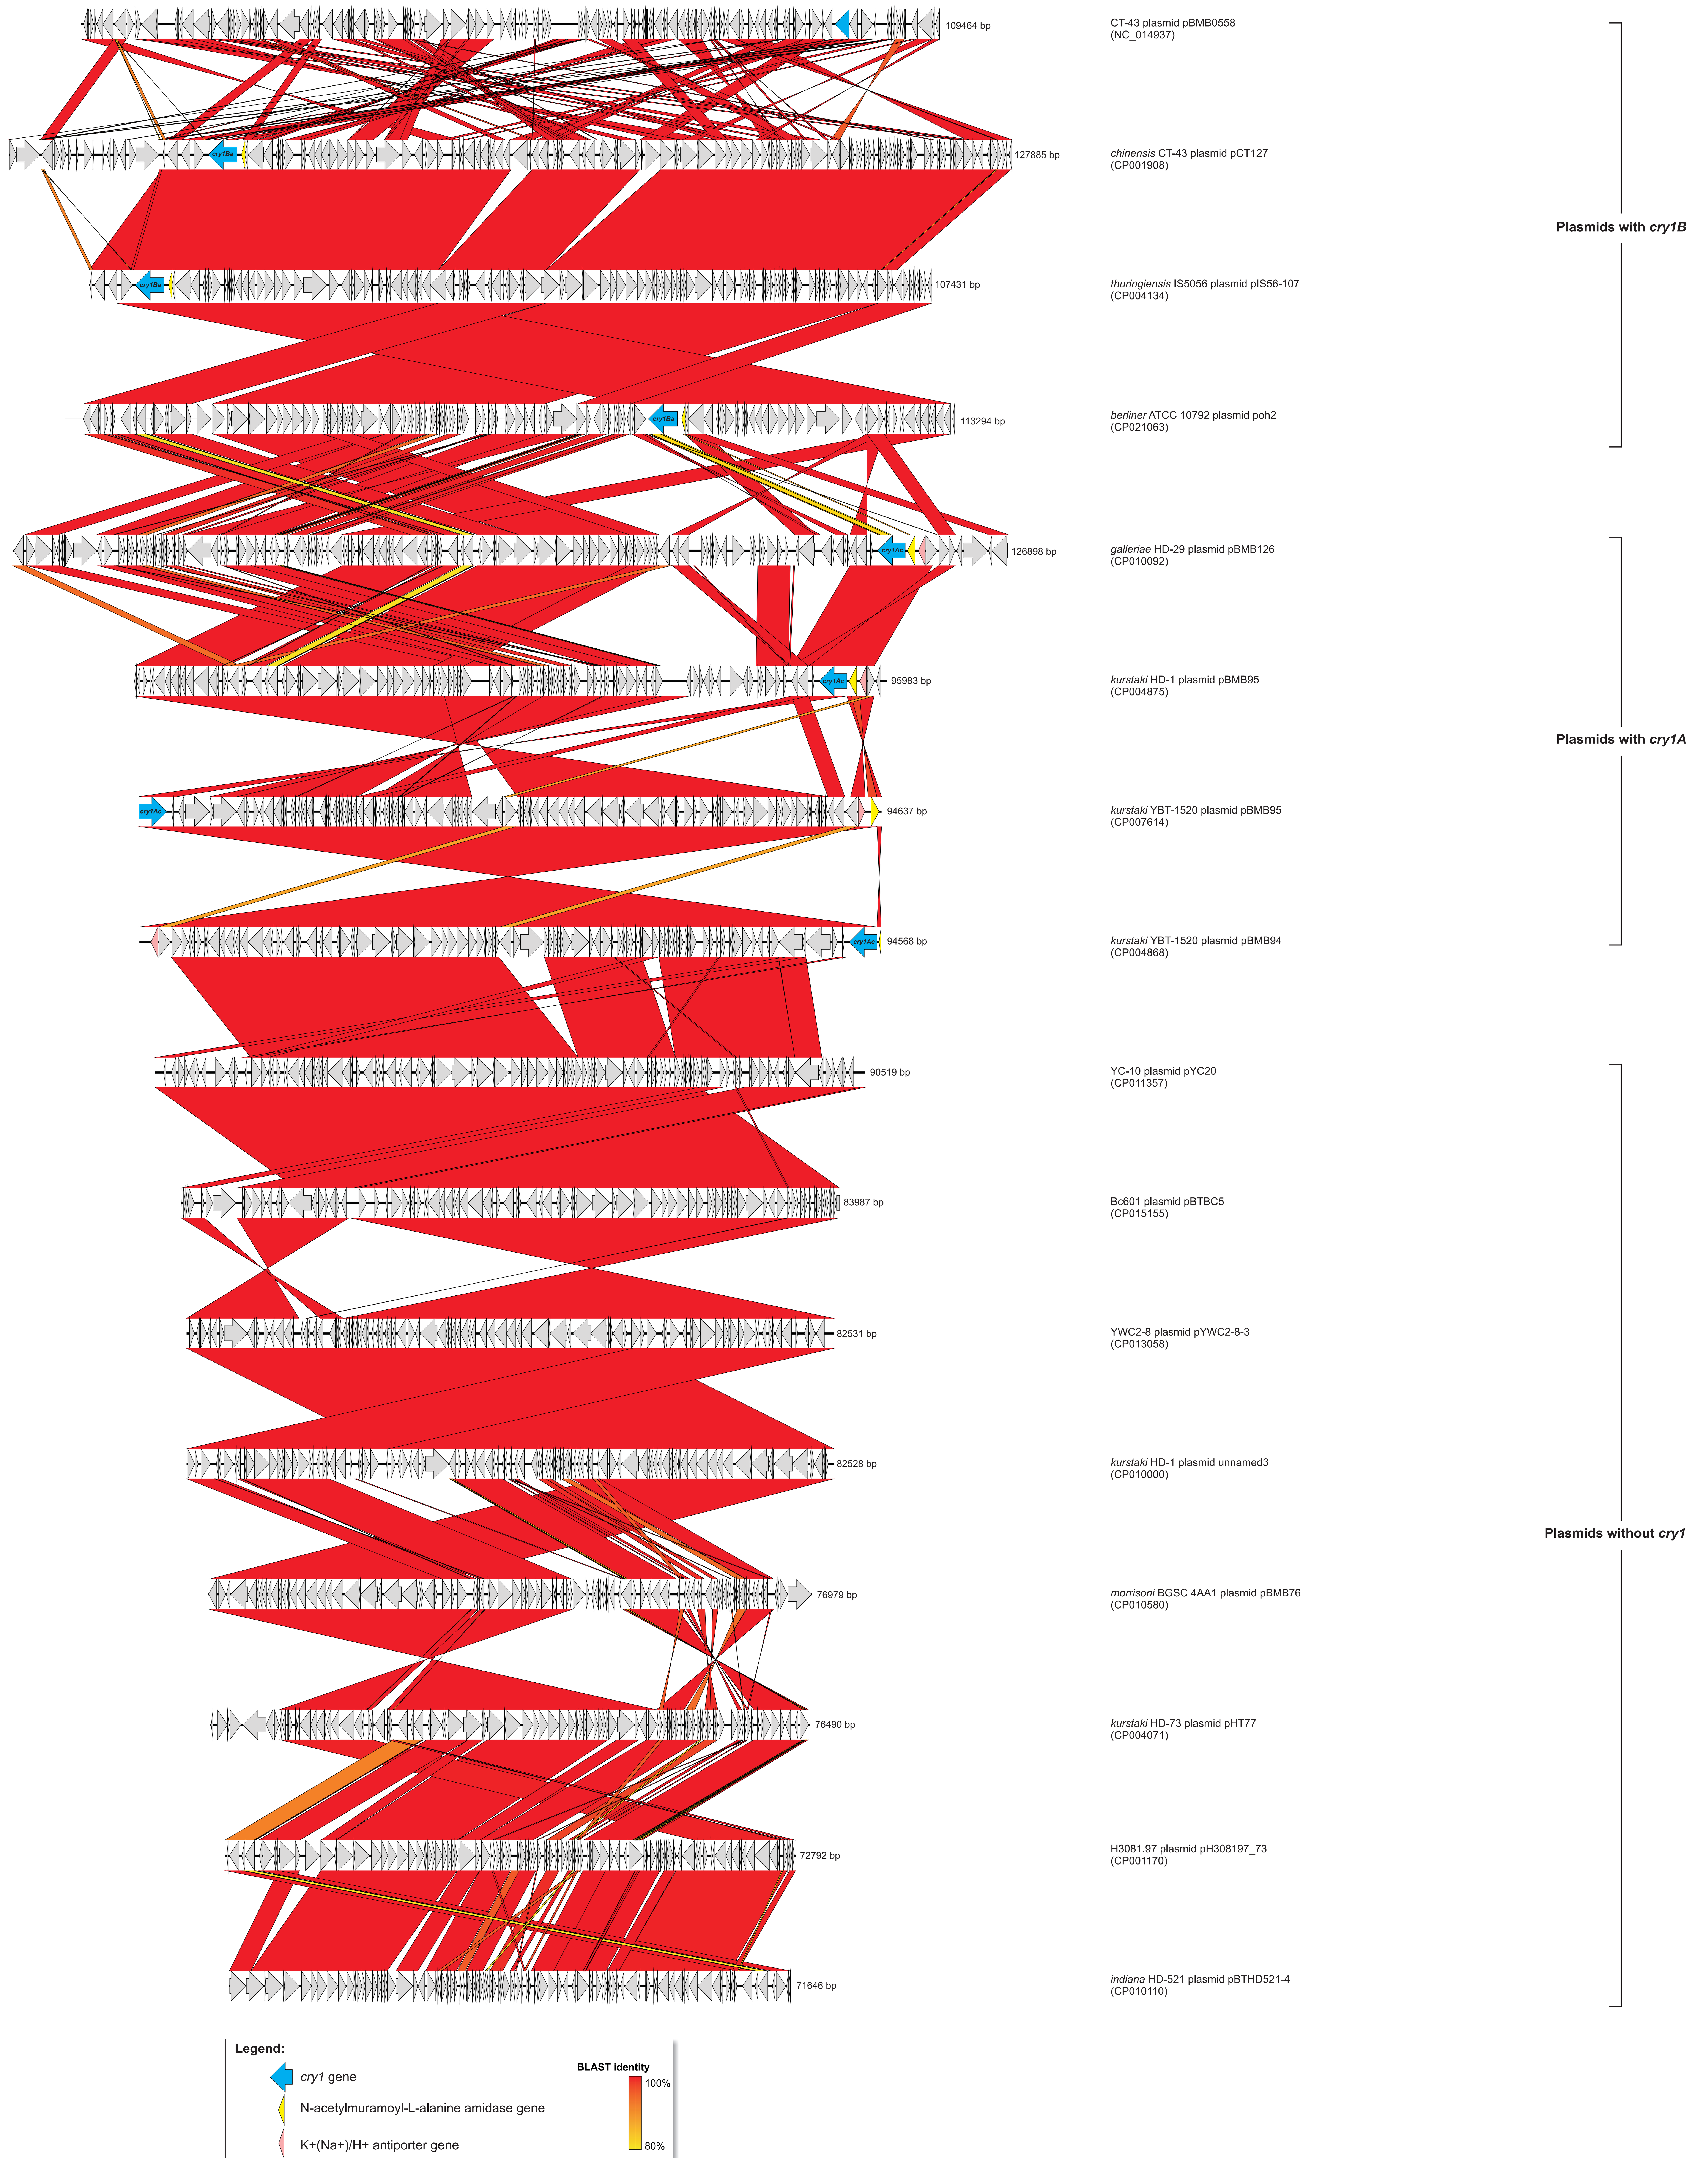

**Fig. S6.** Comparison of plasmids with *ori60* replication type carrying *cry1A* or *cry1B* with similar plasmids missing the *cry1* genes.

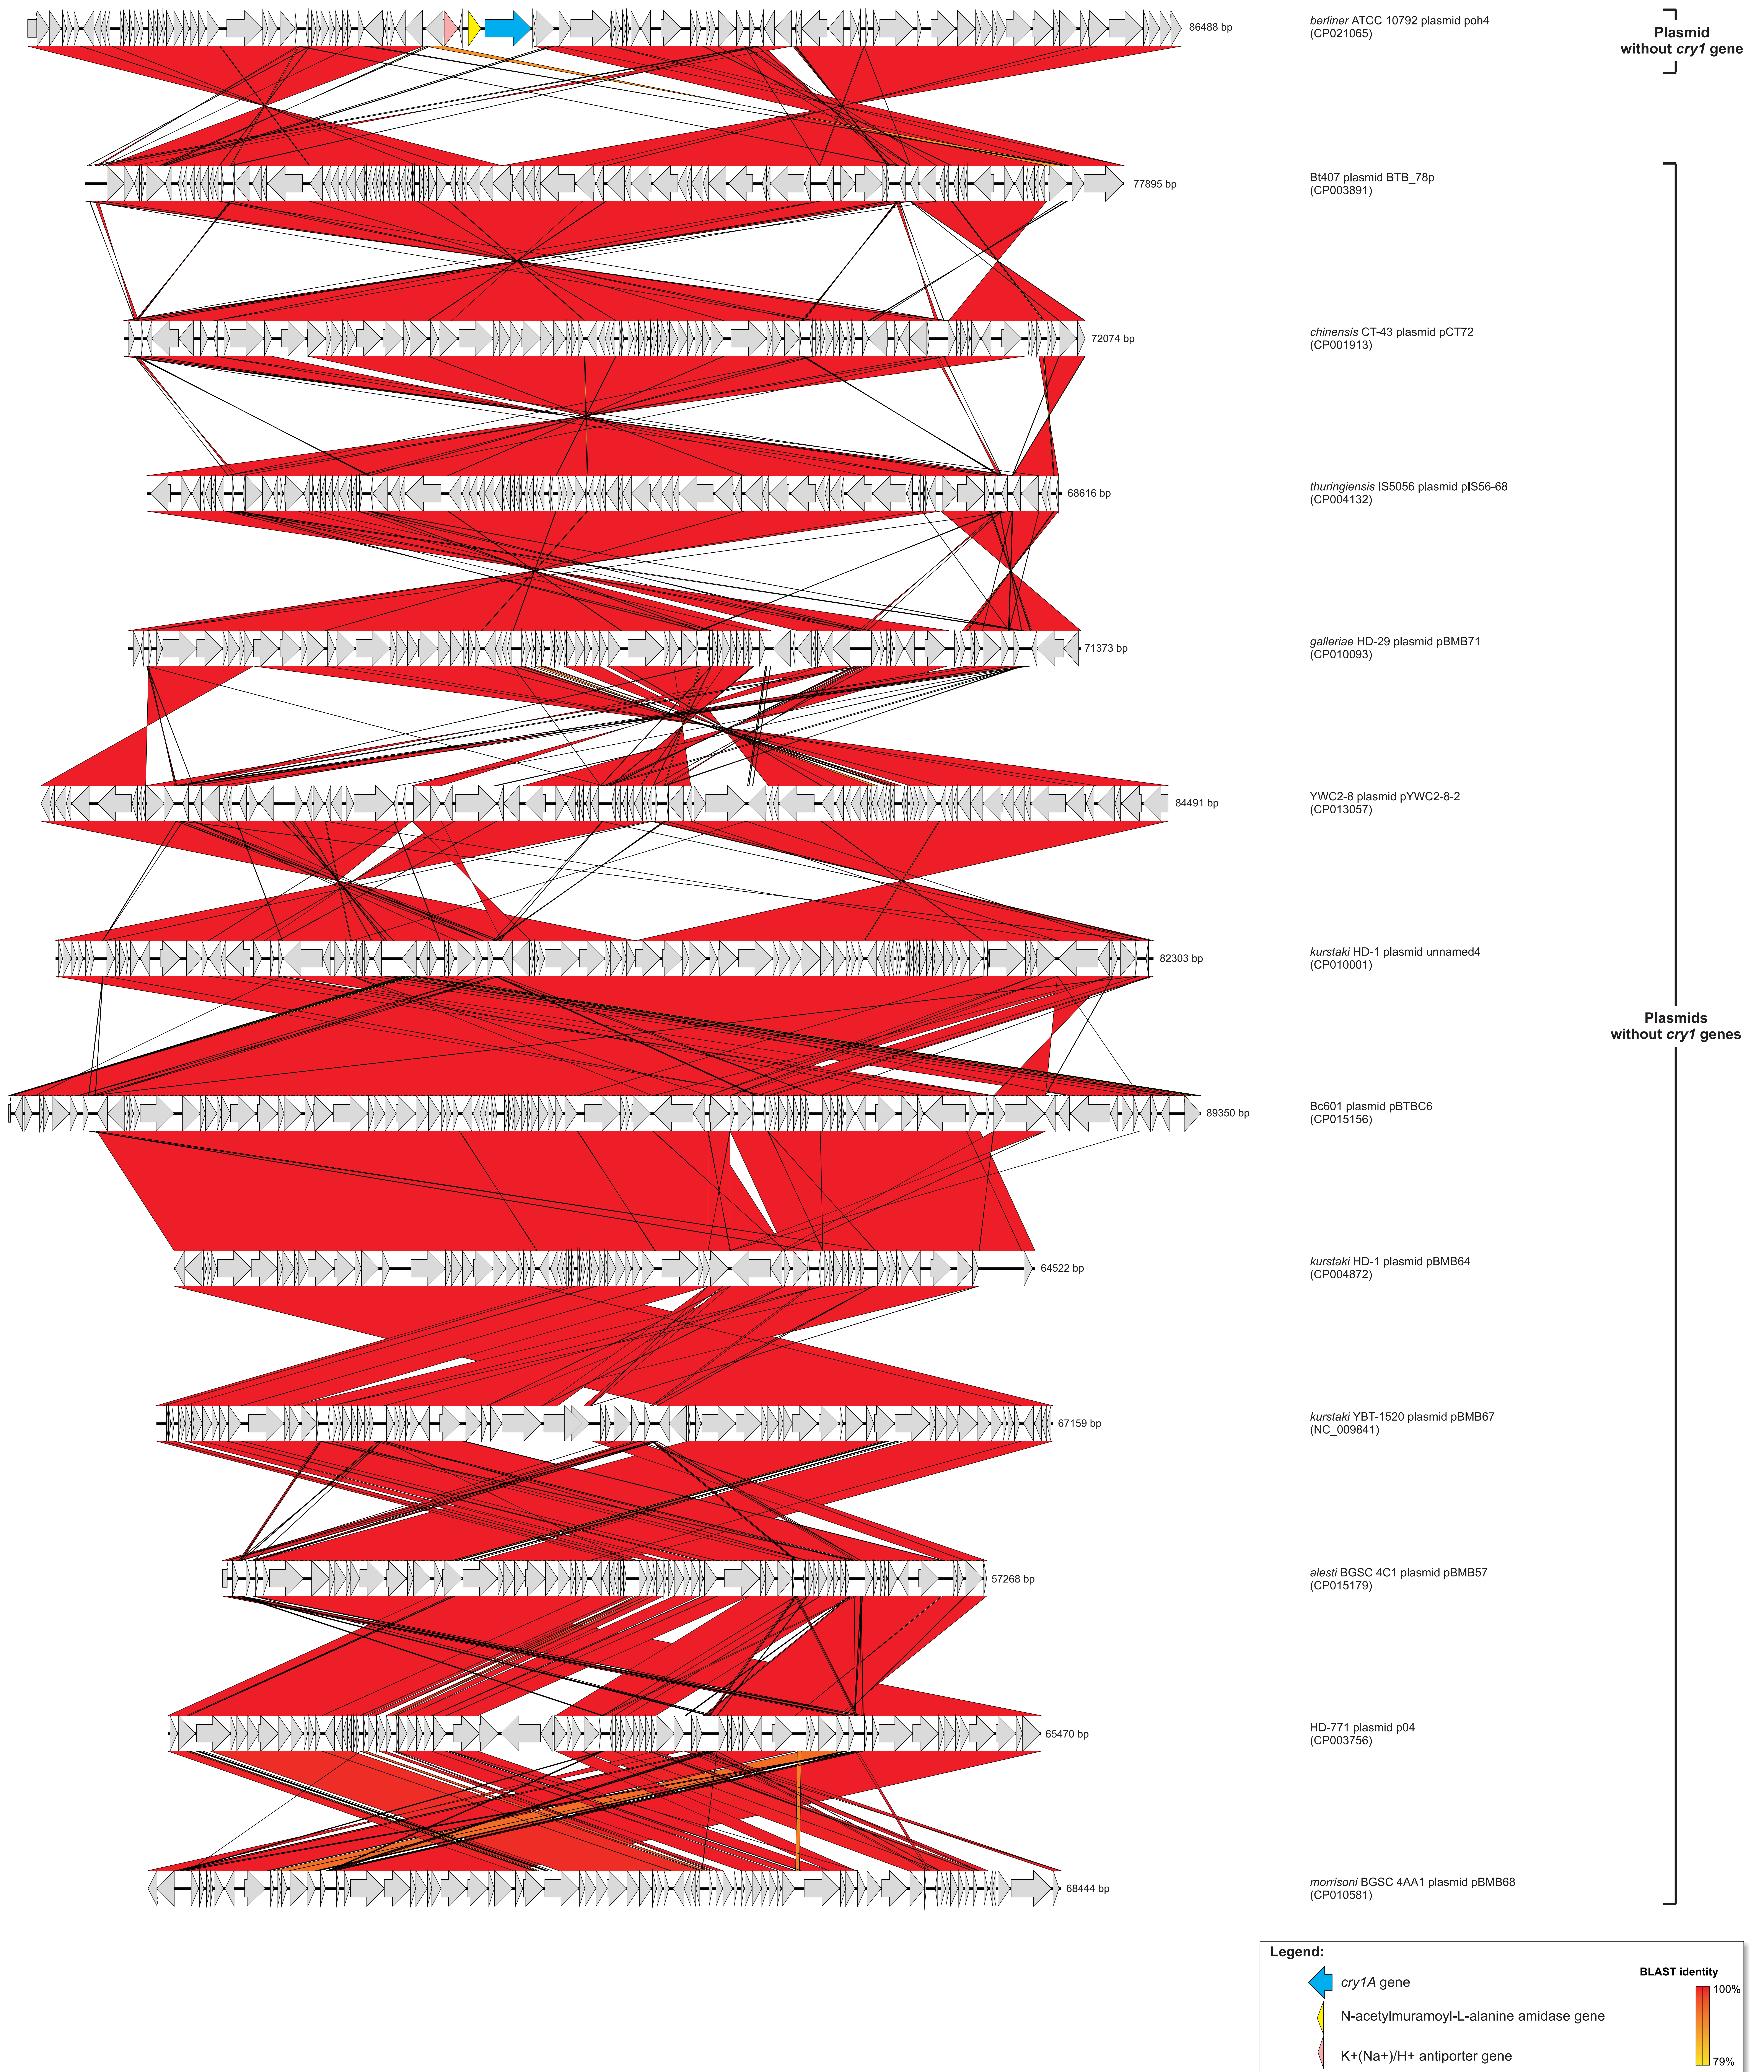

**Fig. S7.** Comparison of plasmid with *ori43* replication system carrying *cry1A* with related plasmids missing the *cry1* genes.

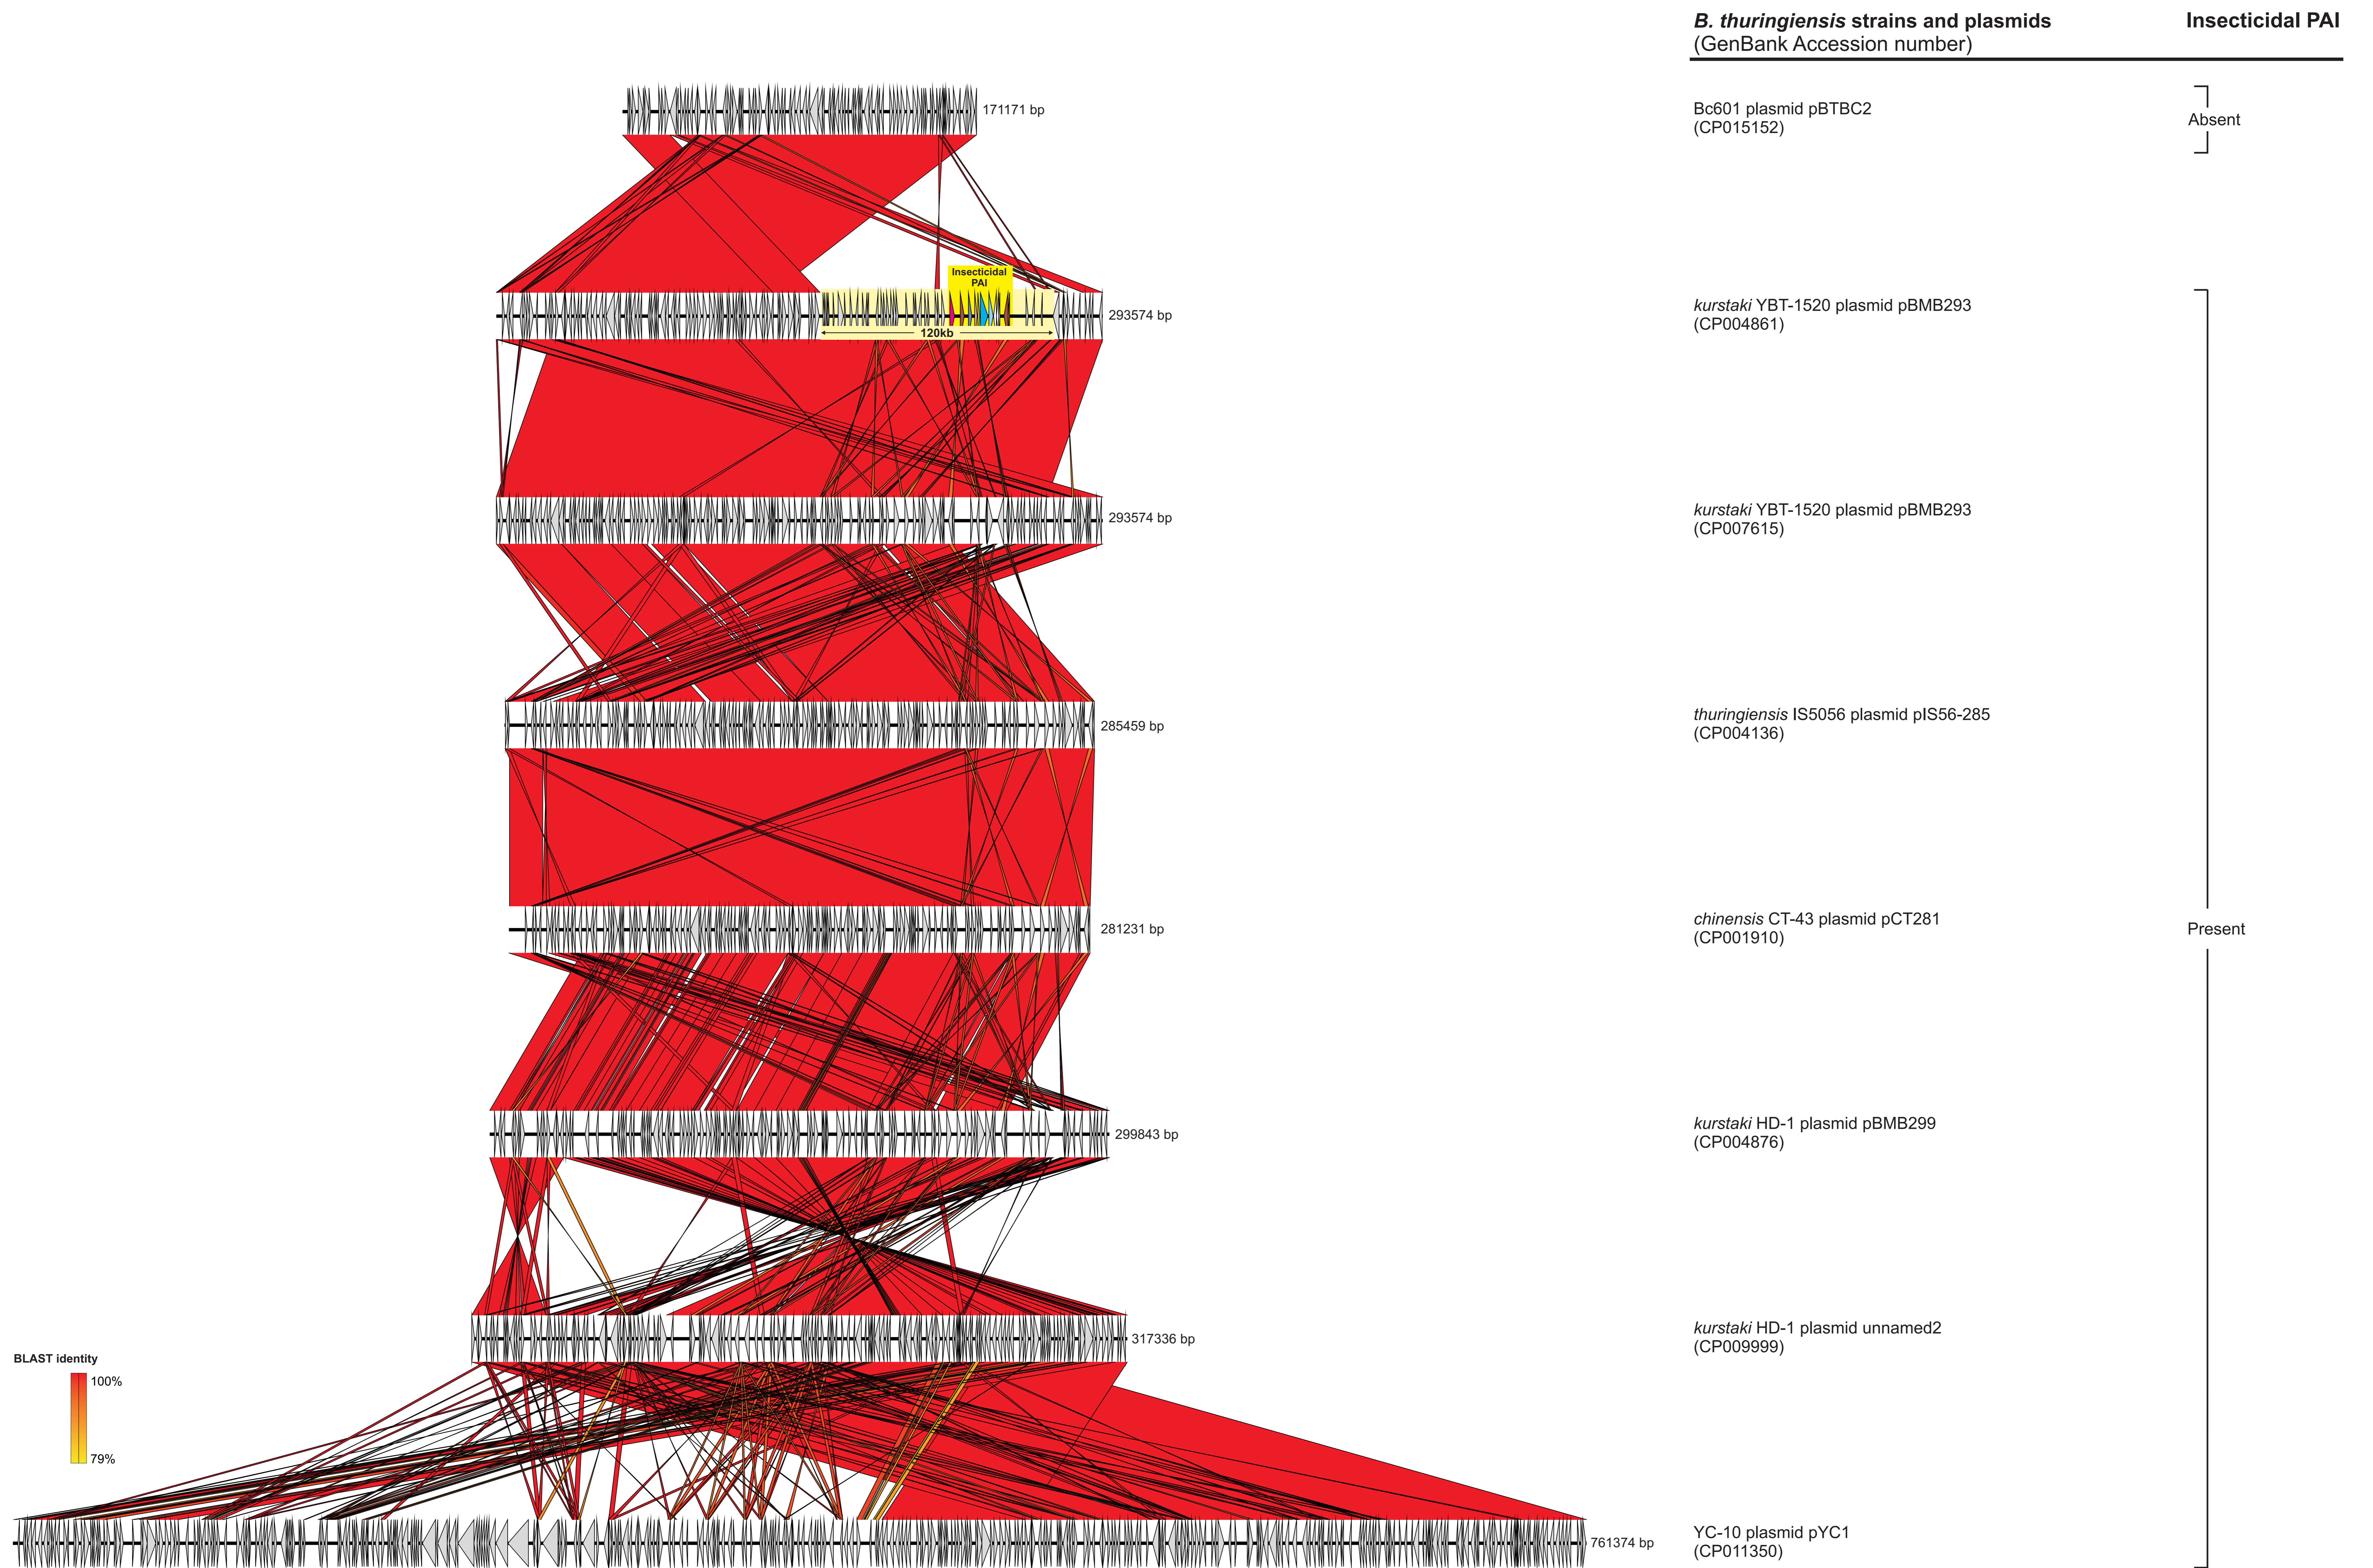

**Fig. S8.** Putative gene cassette (~120 kb) covering the insecticidal PAI.

***B. thuringiensis* strains and plasmids**  
(GenBank Accession number)

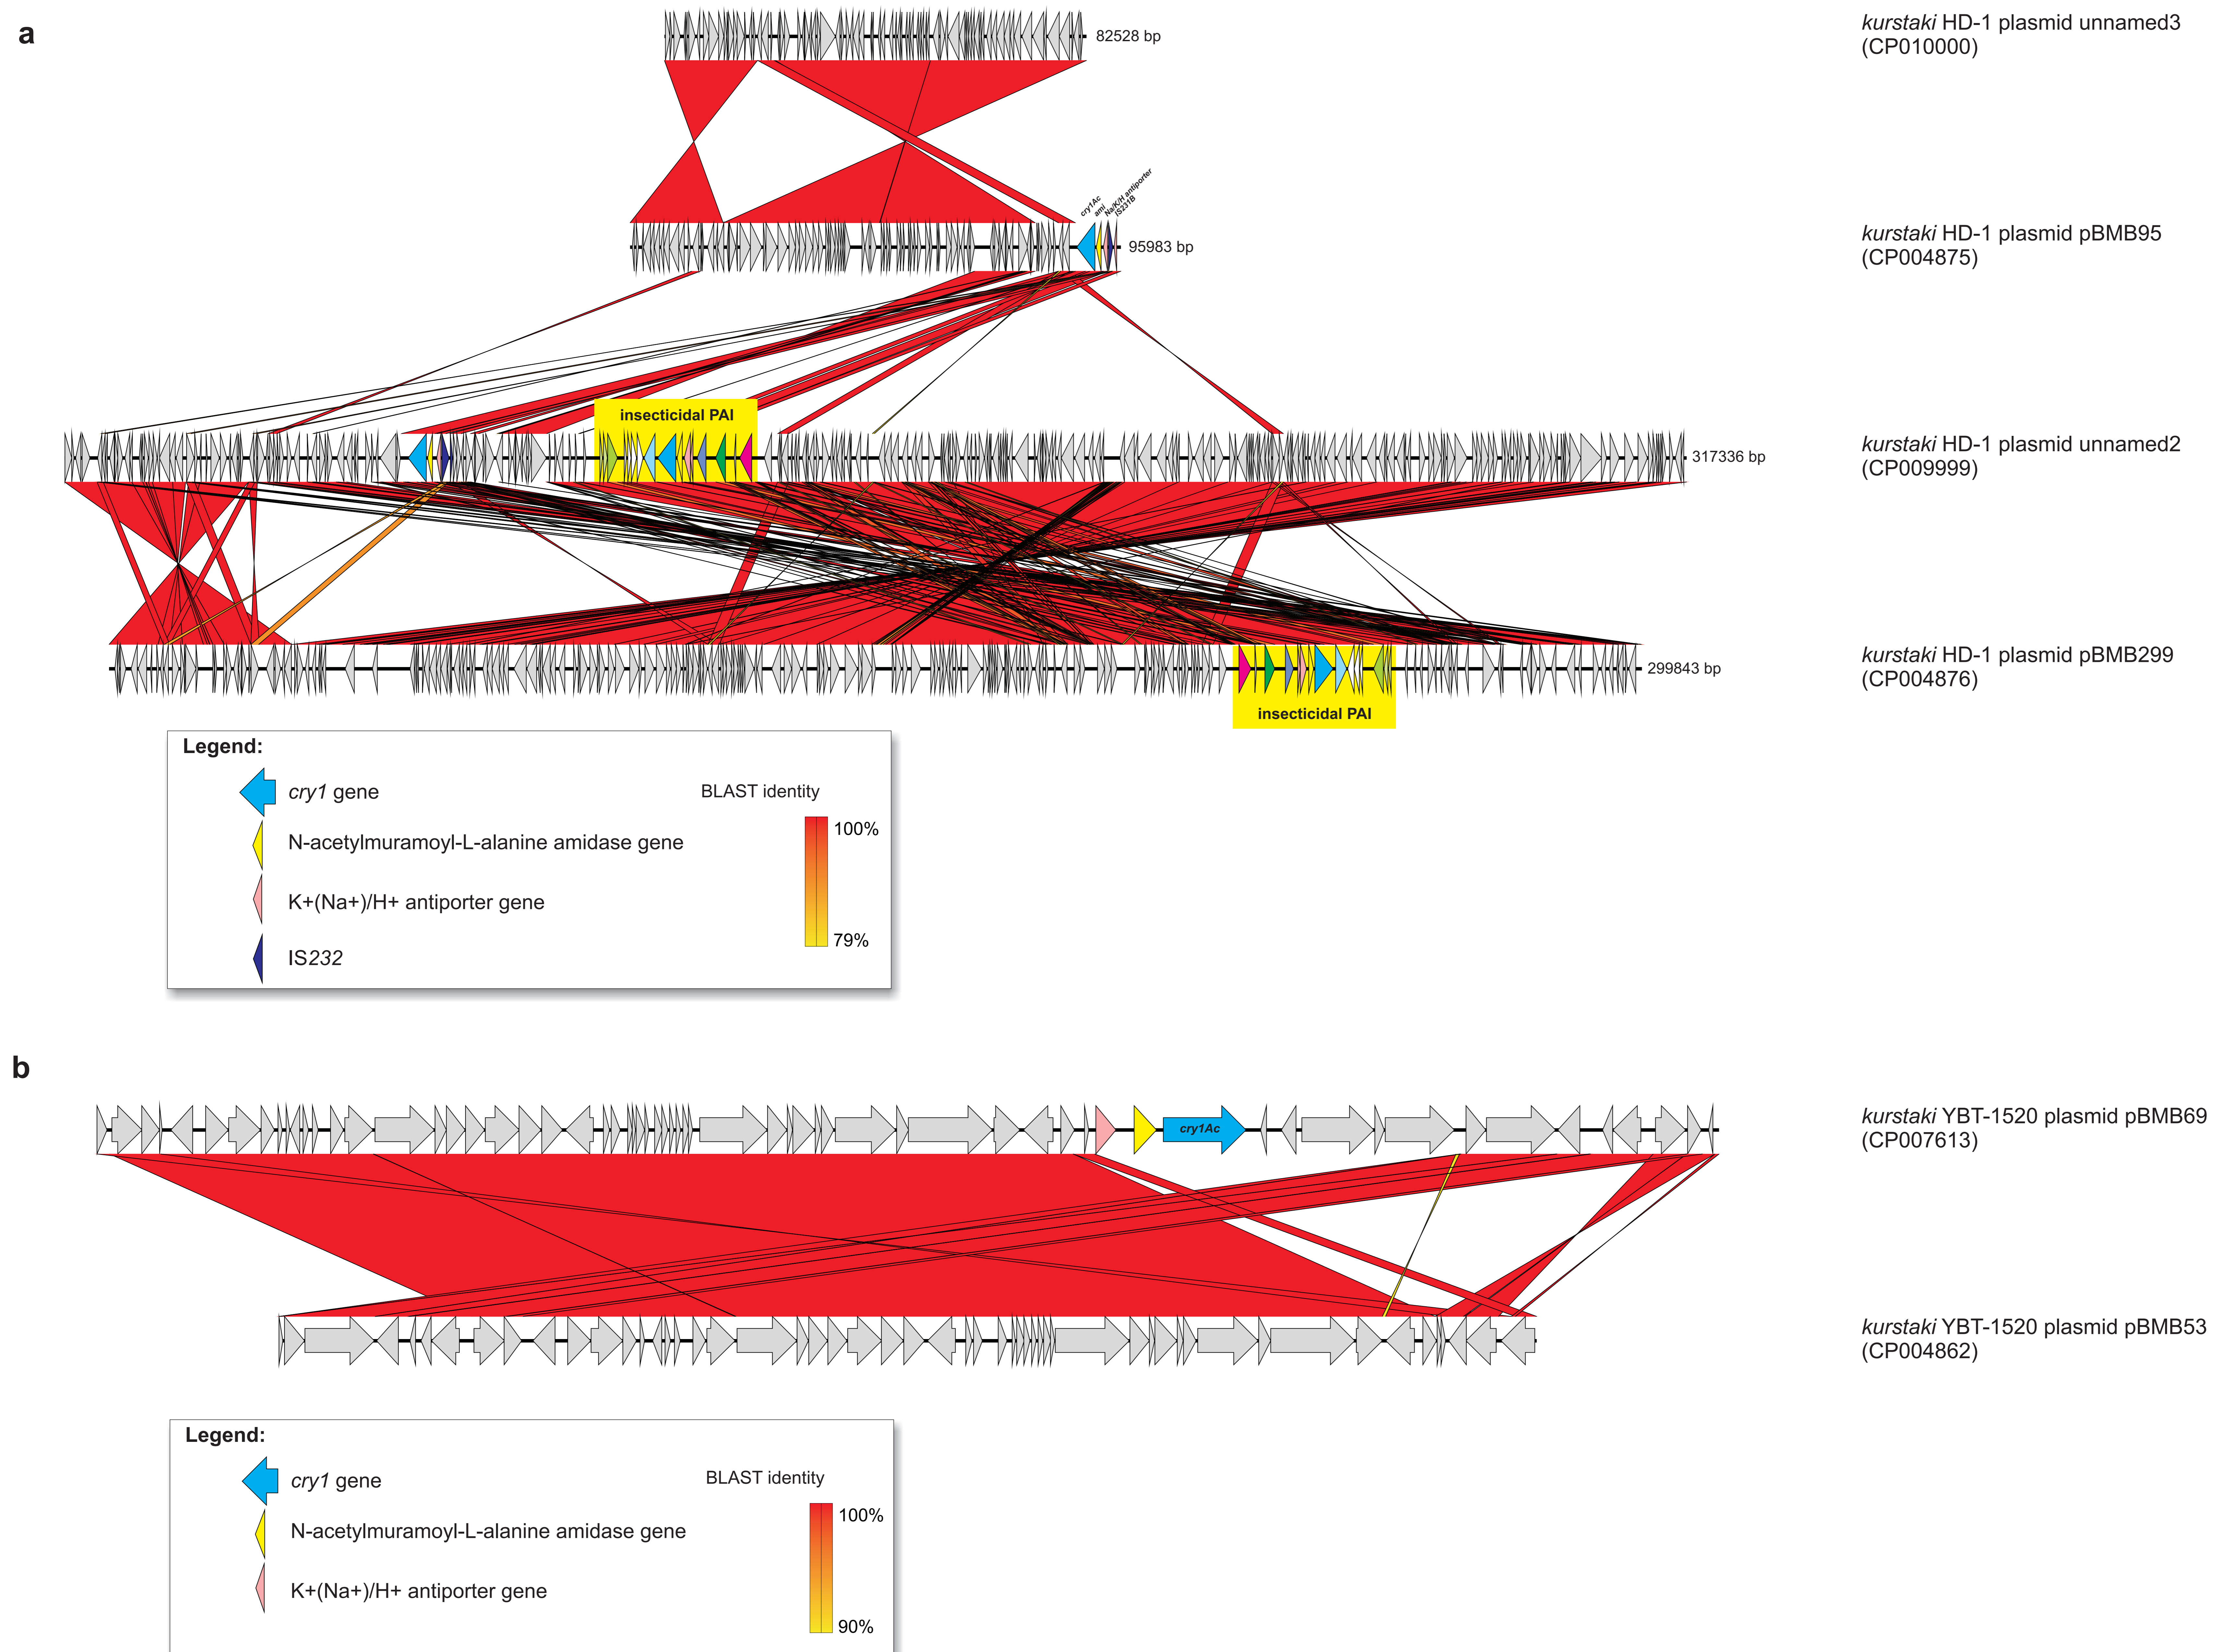

**Fig. S9.** Inconsistencies in *cry1Ac* location in plasmids from the same *B. thuringiensis* strains deposited in GenBank by various sequencing projects; (a) *B. thuringiensis* sv. *kurstaki* HD-1 plasmids (CP009999-CP010000 vs. CP004875-CP004876), and (b) *B. thuringiensis* sv. *kurstaki* strain YBT-1520 plasmids (CP007613 vs. CP004862).

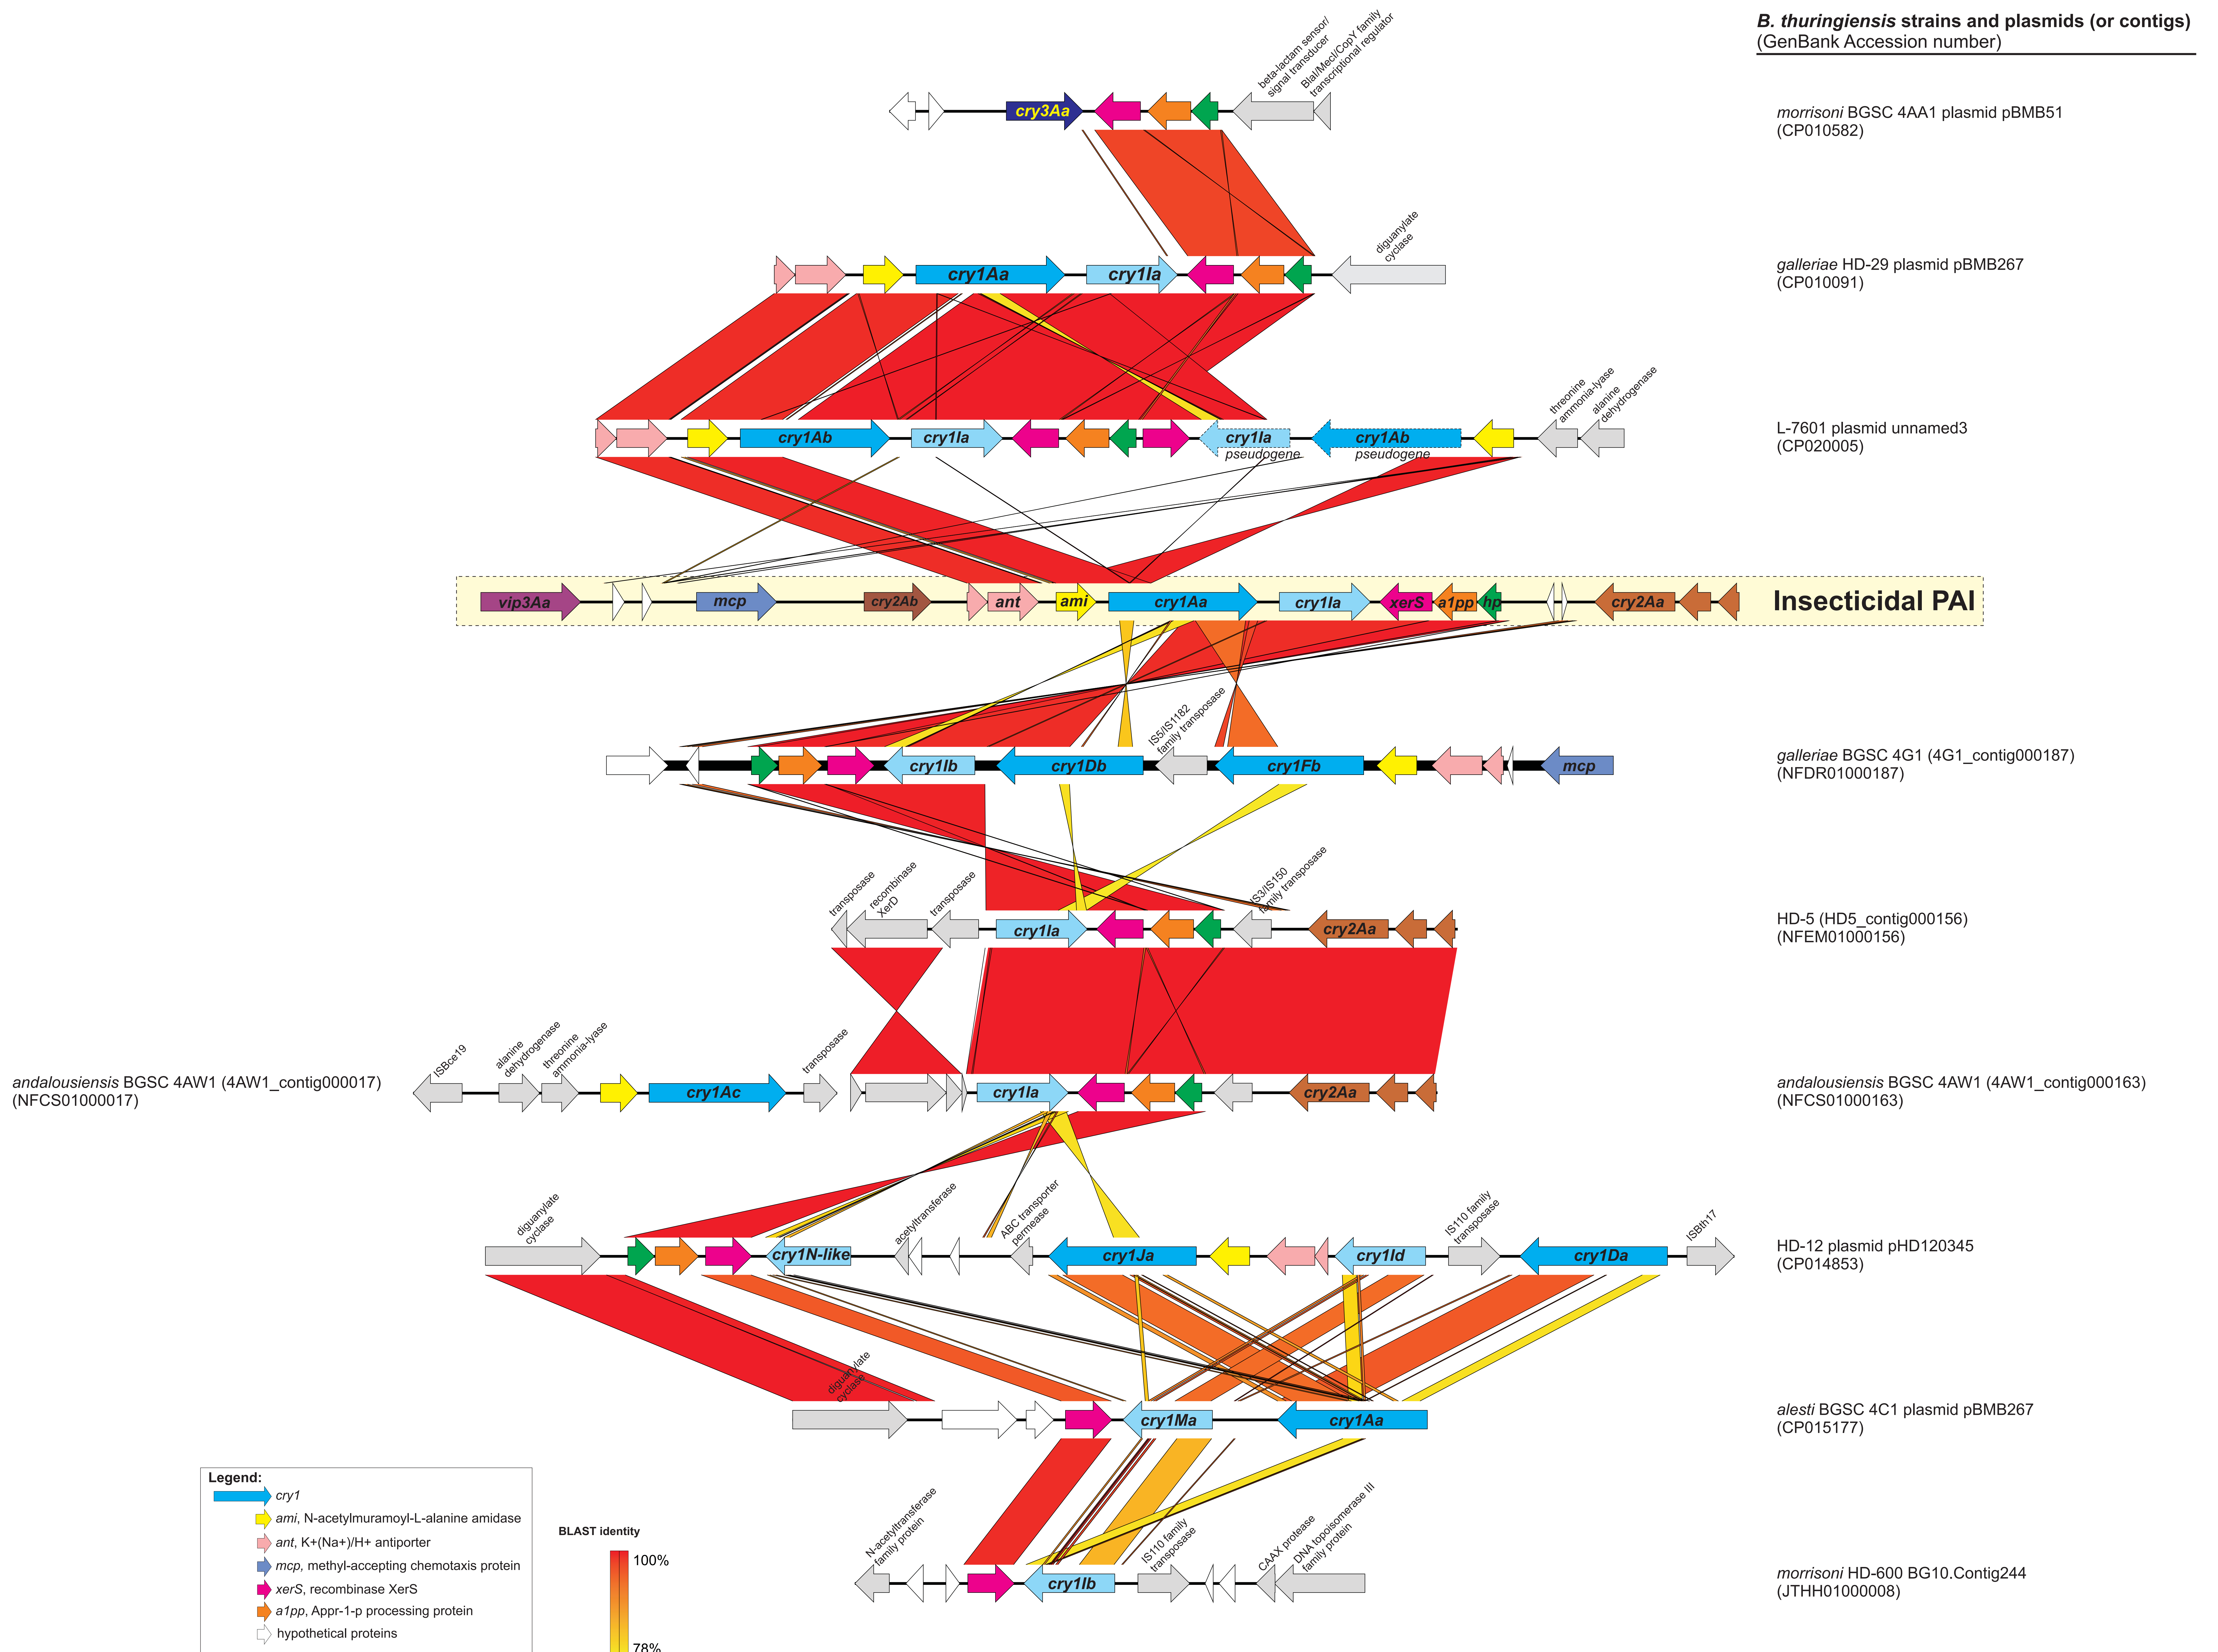

**Fig. S10.** Genetic environment of *cry1I*, *cry1M*, *cry1N-like* and *cry3A* genes.

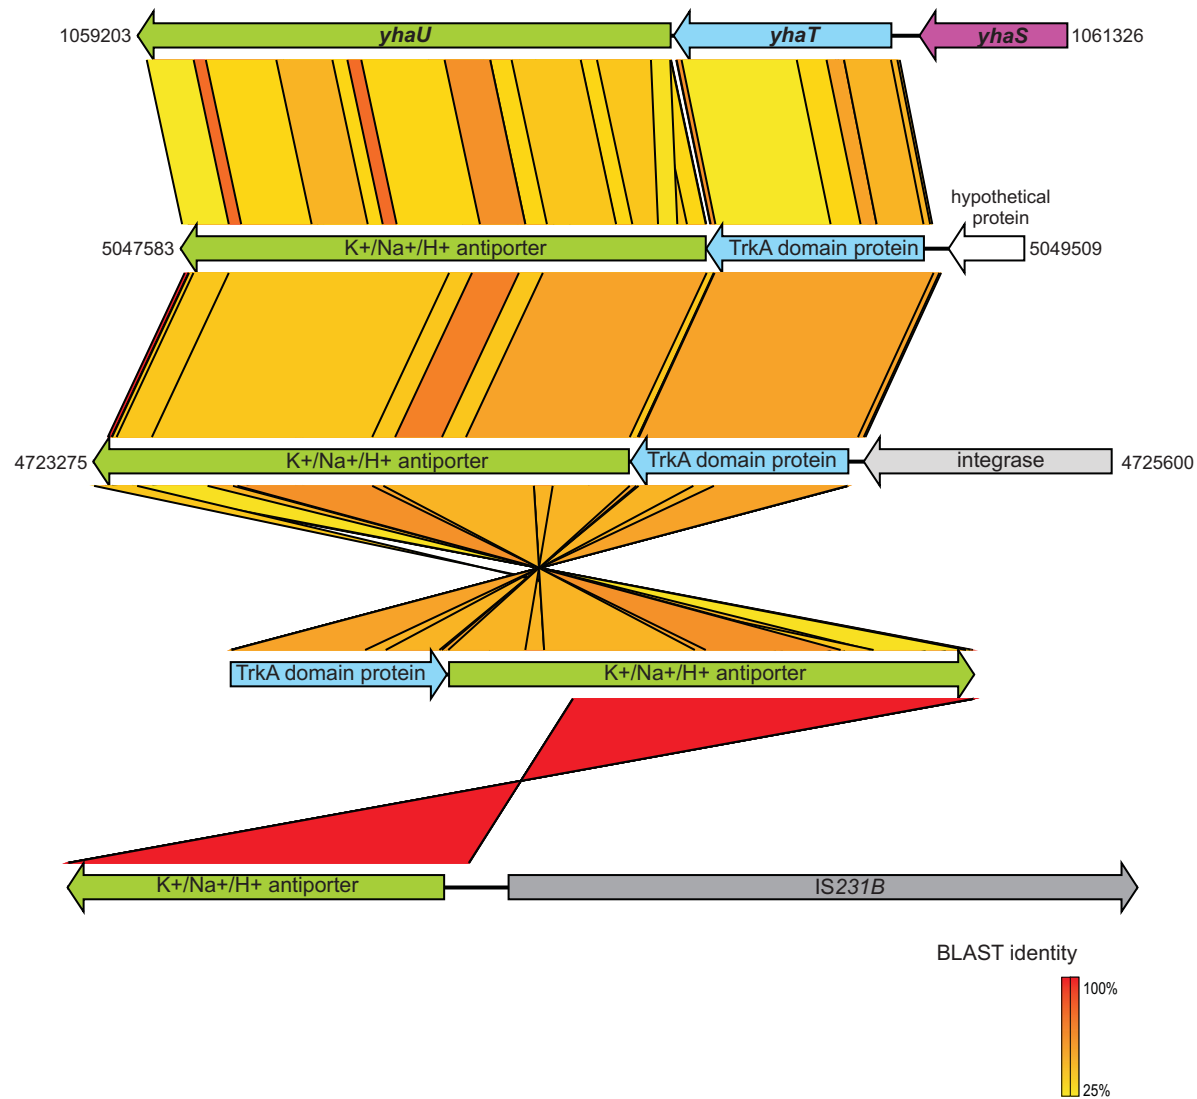

| Strain                                                   | Localization in genome | GenBank Accession number |
|----------------------------------------------------------|------------------------|--------------------------|
| <i>B. subtilis</i> subsp. <i>subtilis</i> 168            | chromosome             | NC_000964                |
| <i>B. thuringiensis</i> ser. <i>thuringiensis</i> IS5056 | chromosome             | CP004123                 |
| <i>B. thuringiensis</i> ser. <i>thuringiensis</i> IS5056 | chromosome             | CP004123                 |
| <i>B. thuringiensis</i> ser. <i>thuringiensis</i> IS5056 | plasmid pIS56-285      | CP004136                 |
| <i>B. thuringiensis</i> ser. <i>thuringiensis</i> IS5056 | plasmid pIS56-63       | CP004131                 |

**Fig. S11.** Comparison of *B. subtilis* K<sup>+</sup>(Na<sup>+</sup>)/H<sup>+</sup> antiporter encoded by the *yhaU-yhaT-yhaS* operon with K<sup>+</sup>(Na<sup>+</sup>)/H<sup>+</sup> antiporters from *B. thuringiensis* IS5056 chromosome and the *cry1*-carrying plasmids, using the tblastx algorithm.





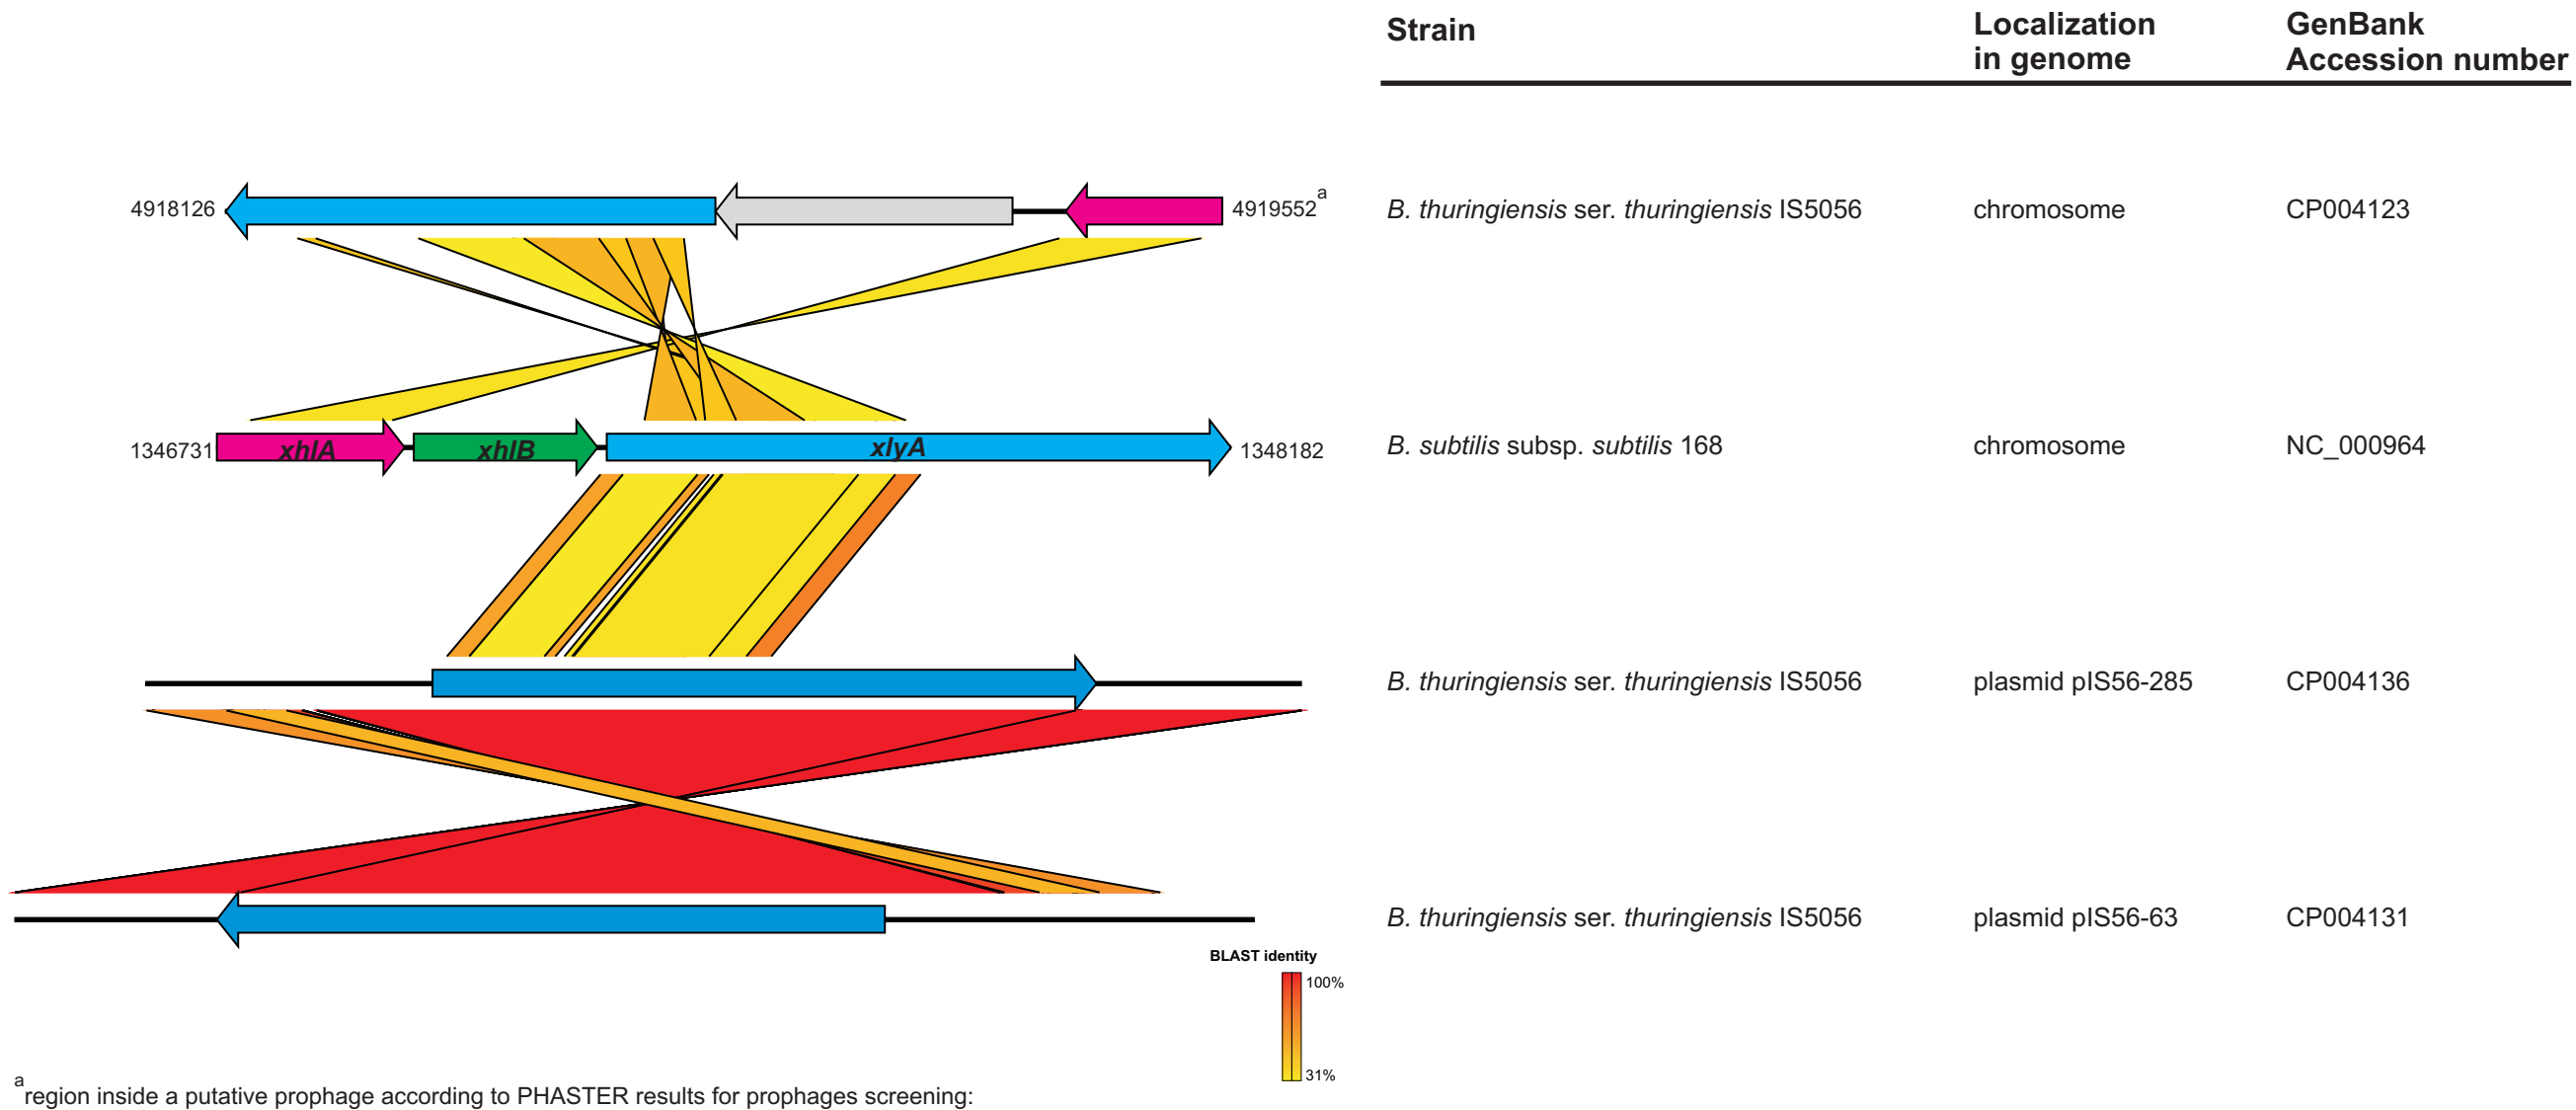

| Region Length | Completeness | Score | # Total Proteins | Region Position | Most Common Phage         | GC %  |
|---------------|--------------|-------|------------------|-----------------|---------------------------|-------|
| 41.1 kb       | questionable | 80    | 53               | 4909665-4950821 | PHAGE_Bacill_phBC6A52(19) | 35.21 |

**Fig. S13.** Comparison of *B. subtilis* *xlyA* with N-acetylmuramoyl-L-alanine amidase genes from *B. thuringiensis* IS5056 chromosome and the *cry1*-carrying plasmids, using the tblastx algorithm.

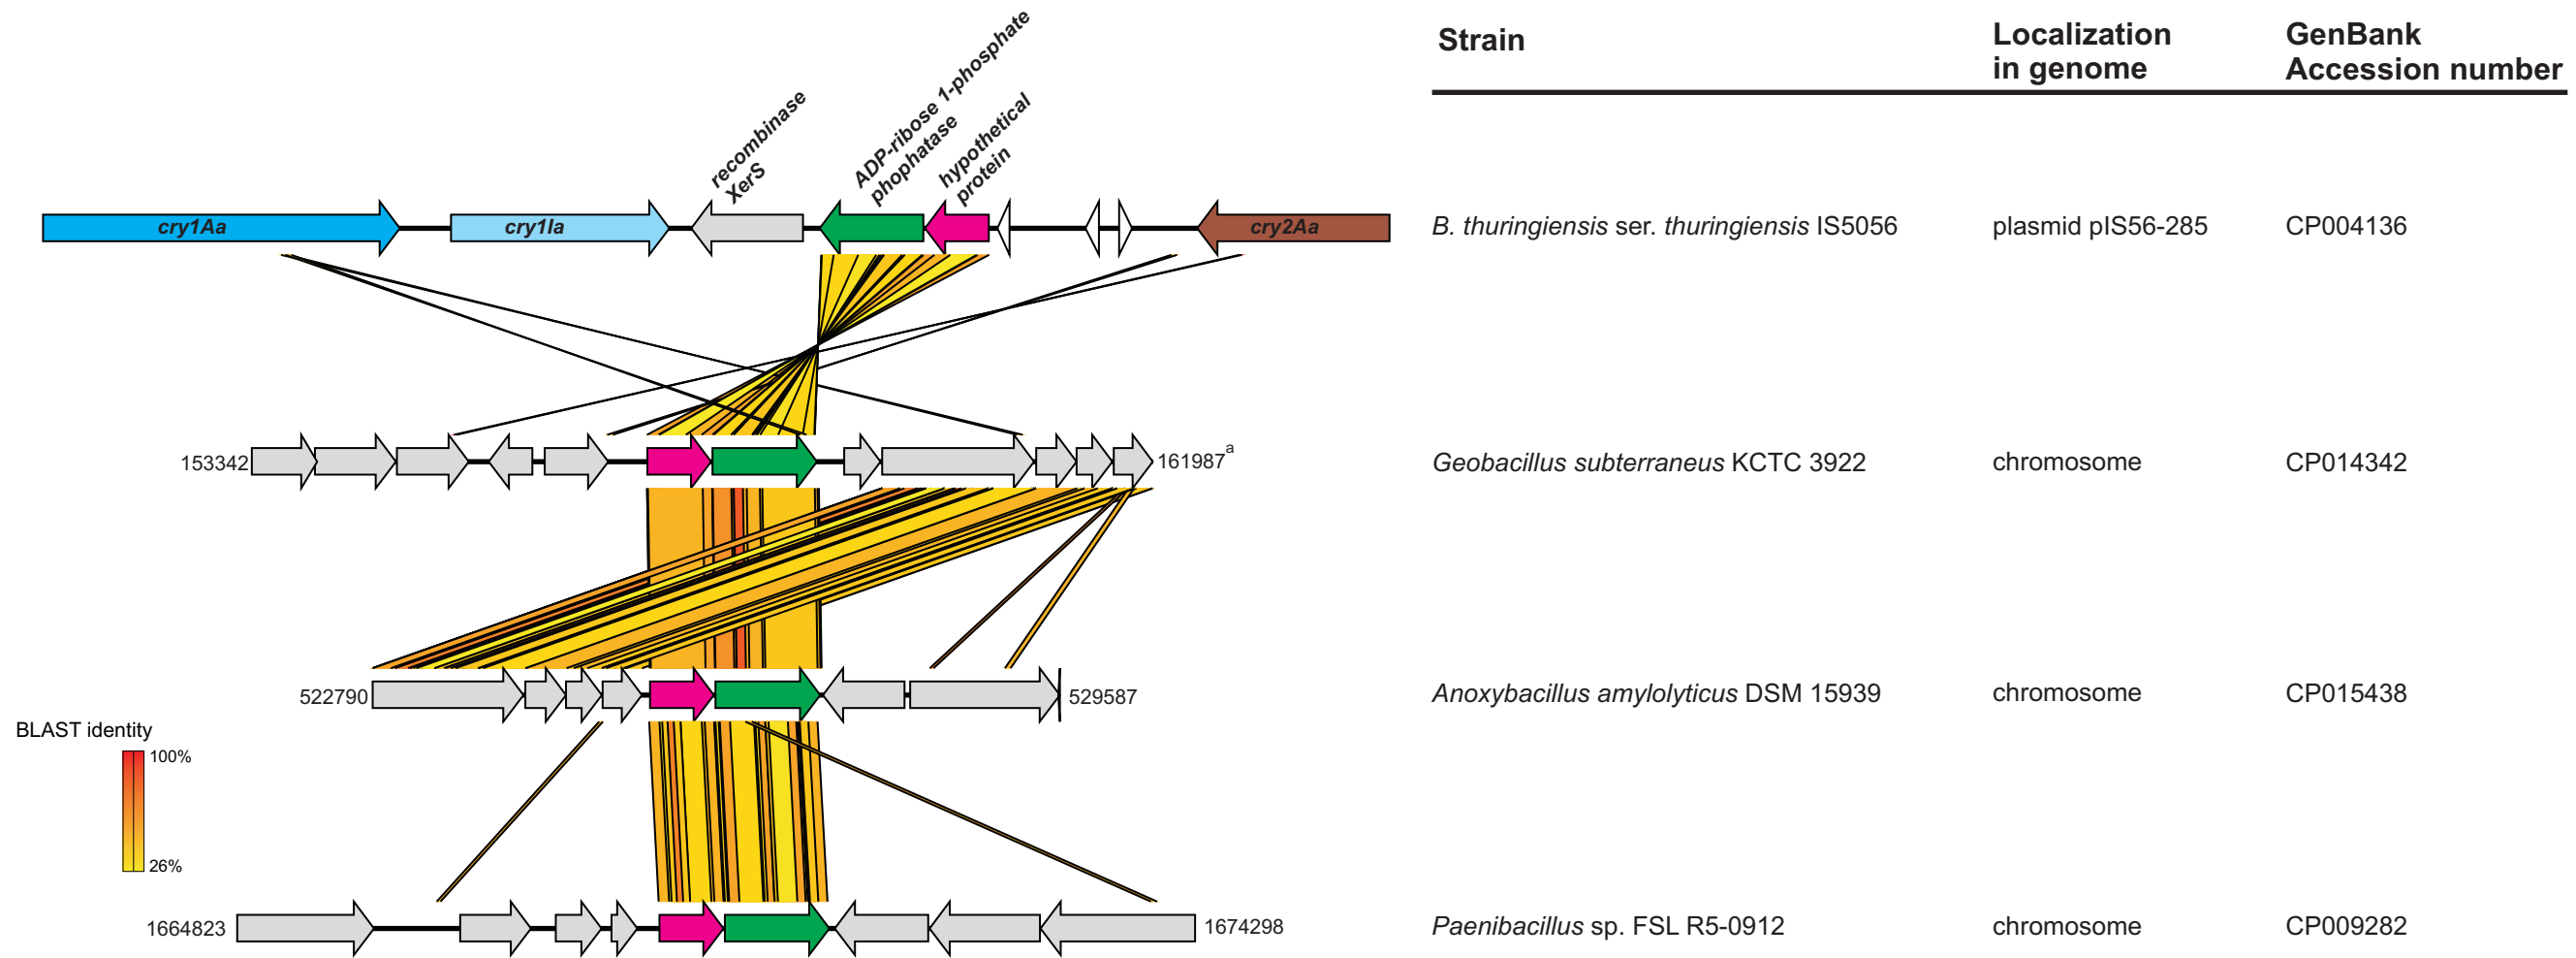

<sup>a</sup> region inside a putative prophage according to PHASTER results for prophages screening:

| Region Length | Completeness | Score | # Total Proteins | Region Position | Most Common Phage               | GC %  |
|---------------|--------------|-------|------------------|-----------------|---------------------------------|-------|
| 15.5 kb       | incomplete   | 30    | 9                | 150734-166241   | PHAGE Entero_phi92_NC_023693(4) | 45.72 |

**Fig. S14.** Comparison (tblastx algorithm) of ADP-ribose 1-phosphate phosphatase gene locus from the insecticidal PAI (*B. thuringiensis* IS5056 plasmid pIS56-285) with similar loci from chromosomes of *Geobacillus subterraneus*, *Anoxybacillus amylolyticus* and *Paenibacillus* sp..
